1 **Title:** Lipidome profiles of postnatal day 2 vaginal swabs reflect fat composition of gilt's  
2 postnatal diet.

3

4 **Running Title.** Effect of diet on lipidome of perinatal vagina

5

6 **Summary sentence.** Vaginal swab lipidome profiles at 48 h reflect the fat composition of  
7 neonatal diet during first two days postnatal.

8

9 **Authors:** KaLynn Harlow<sup>1</sup>, Christina R. Ferreira<sup>2</sup>, Tiago J.P. Sobreira<sup>2</sup>, Theresa Casey<sup>1\*‡</sup>, and  
10 Kara Stewart<sup>1\*</sup>.

11

12 **Affiliations:** 1. Department of Animal Sciences, Purdue University; 2. Metabolomics Core,  
13 Bindley Science Center, Purdue University.

14

15 **Grant Support:** This activity was funded by Purdue University as part of AgSEED Crossroads  
16 funding to support Indiana's Agriculture and Rural Development.

17

18 **\*indicates equal contribution**

19

20 **‡ Correspondence.**

21 Theresa M. Casey

22 Department of Animal Sciences

23 270 S Russell Street

24 West Lafayette, IN 47907 USA

25 [theresa-casey@purdue.edu](mailto:theresa-casey@purdue.edu)

26

27 **Key words.** lipidome, vagina, developmental origins of health and disease, colostrum,  
28 biomarker

29

30 **Abbreviations.** Precursor (Prec) and neutral loss (NL) scan modes. phosphatidylethanolamine  
31 (PE), acylcarnitines (AC), cholesteryl esters (CE), glycosylinositolphosphoceramides (GIPC),  
32 phosphatidic acids (PA), phosphatidylcholines (PC), alkenyl-acyl PCs (ePC), sphingomyelin  
33 (SM), phosphatidylinositols (PI), phosphatidylglycerols (PG), phosphatidylserines (PS), fatty  
34 acids (FA), triacylglycerol (TAG), bottle fed milk replacer (B); suckled colostrum (S); bottle fed  
35 milk replacer and supplemented with fat (BF); suckled and supplemented with fat (SF),  
36 receiver operating characteristic (ROC); area-under-the-curve (AUC); multiple reaction  
37 monitoring (MRM); postnatal day (PND)

38 **Abstract.**

39 We hypothesized that postnatal development of the vagina is impacted by early nutritional  
40 environment. Our objective was to determine if lipid profiles of vaginal swabs were different  
41 between gilts suckled by sow or fed milk replacer the first 48 h postpartum, with and without a  
42 lard-based fat supplement. Gilts (>1.3 kg) were selected at birth across 8 litters and assigned to  
43 treatments: colostrum suckled (S, n=8); S plus fat supplement (SF, n=5); bottle-fed milk replacer  
44 (B, n=8); or B plus fat supplement (BF, n=7). At 48 h postnatal, vaginal swabs were taken with  
45 a cytology brush, immersed in ultrapure water to burst cells, and lipids extracted for analysis  
46 using multiple reaction monitoring (MRM)-profiling. Lipids extracted from serum collected at  
47 48 h from gilts and milk collected from sows at 24 h were also analyzed with MRM-profiling.  
48 Receiver operating characteristic curve analysis found 18 lipids highly distinguished [area-under-  
49 the-curve (AUC) > 0.9] between S and B gilts, including phosphatidylethanolamine with 34  
50 carbon and four unsaturations in the fatty acyl residues [PE(34:4)]. Twelve lipids from vaginal  
51 swabs highly correlated ( $r > 0.6$ ;  $p < 0.01$ ) with nutrition source. Lipids more abundant in milk  
52 replacer drove association. For example, mean intensity of PE (34:4) was 149-fold higher in  
53 milk replacer than colostrum, with 1.6- and 2.12-fold higher levels in serum and vaginal swab  
54 samples ( $p < 0.001$ ), respectively, of B versus S gilts. Findings support that vaginal swabs can be  
55 used to noninvasively study effects of perinatal nutrition on tissue composition.

56

## 57 **Introduction**

58 Early nutritional environment affects long term health and fertility. In swine, colostrum ingestion  
59 is essential for postnatal piglet survival, growth, and development because it provides immunity,  
60 nutrients, energy, and bioactive factors [1, 2]. The window of opportunity for milk-borne bioactive  
61 factors to influence neonate development is limited, and primarily occurs prior to closure of tight  
62 junctions between cells lining the piglet's gut. Closure of the gut occurs by 48 h postnatal [3].  
63 During the first 48 h postnatal, piglets ingest up to 30% of their body weight in milk [4]. This time-  
64 period is a critical developmental period for the gilt reproductive system, including the formation  
65 of uterine glands, otherwise known as adenogenesis [5, 6]. Colostrum ingestion significantly  
66 affected the developmental trajectory of uterine tissue [7-10]. Replacement gilts with less  
67 colostrum consumption than littermates as indicated by blood immunocrit values had reduced litter  
68 sizes relative to other sows [11, 12]. Colostrum-deprivation also resulted in significantly different  
69 patterns of uterine gene and protein expression [13].

70

71 The link between early nutritional environment, uterine development, and subsequent  
72 reproductive potential led to the hypothesis that early nutritional environment affects  
73 reproductive tract development and subsequently predicts long-term reproductive performance of  
74 gilts. However, in order to evaluate uterine development, the animal must be euthanized. We  
75 previously proposed that since the vagina is embryologically related to the uterus [14], its  
76 postnatal developmental trajectory may also be responsive to early nutritional environment.  
77 Moreover, we proposed that using vaginal swabs to non-invasively sample lower reproductive  
78 tract may serve as a means to evaluate differences in nutritional exposures on gilt development.  
79 Using a biomarker-discovery technique known as multiple reaction monitoring (MRM) profiling,

80 we found that lipid profiles of vaginal swabs taken on postnatal day 14 differed between gilts  
81 that were fed milk replacer during the first 48 h postpartum before return to litter versus gilts that  
82 suckled sow's milk continuously from birth [15].

83

84 While our previous studies supported the potential of using biological material obtained from  
85 vaginal swabs to distinguish between gilts exposed to different nutritional environments the first  
86 2 days postnatal [16], the lapse of time from colostrum exposure and relatively small sample size  
87 limited interpretation. In this study, we further investigated the efficacy of using MRM-profiling  
88 of vaginal lipids to differentiate PND 2 vaginal swabs between gilts suckled by sow or fed milk  
89 replacer. Secondly, we tested the effect of a lard based supplement on vaginal lipid profiles of  
90 gilts [17-20].

91

## 92 **Materials and Methods**

### 93 *Animals and study design*

94 Prior to beginning studies involving animals the protocol was reviewed and approved by Purdue  
95 University's Institutional Animal Care and Use Committee (Protocol #1605001416). Standard  
96 farrowing protocols for the Purdue University Animal Sciences Research and Education Swine  
97 facility were followed. All lipidomics sample preparation and analysis was completed at the  
98 Proteomics and Metabolomics Core Facilities in the Bindley Bioscience Center at Purdue  
99 University.

100

101 Three to four gilts were selected per litter from eight different sows which were monitored  
102 during parturition (Supplemental Figure S1). Immediately after delivery, all gilts were towel-  
103 dried, weighed, and placed in a holding cart until at least three gilts above 1.3 kg were delivered.  
104 Within litter, each gilt was randomly assigned to one of four treatment groups and ear tagged for  
105 identification. The four treatment groups were: suckled (S; n=8); suckled plus fat-supplement  
106 (SF; n=5); bottle-fed with milk-replacer (B; n=8), and; bottle-fed milk replacer plus fat-  
107 supplement (BF; n=7). Body weights were recorded at birth and 48 h. All gilts were administered  
108 a 2 ml dose of Camas experimental antibody product (Camas Incorporated; Le Center, MN)  
109 using Pump It™ Automatic Delivery System (Genesis Industries, Inc.) at birth, and at 3 h and 9  
110 h after the first dose.

111

112 Gilts in B and BF treatment groups were taken to a separate temperature-controlled nursery,  
113 where they were placed in holding cages in groups of 2-3 piglets. Birthright™ milk replacer  
114 (Ralco Nutrition, Inc.) was mixed using the recommended concentration for orphaned piglets,

115 which was 1:2 replacer to tap water. Reconstituted milk replacer was stored in a refrigerator and  
116 warmed to room temperature prior to feedings. Piglets were fed using Evenflo Classic slow-flow  
117 0-3-month infant bottles (Evenflo Feeding, Inc.) approximately every 2 h, with a minimum of 5  
118 ml fed per time point. In the event piglets did not consume at least 30 ml after two consecutive  
119 feedings, 15 ml of milk replacer was oral gavage-fed using a 30 ml syringe and Kendall™ 4.7  
120 mm x 41 cm feeding tube (Medtronic, Minneapolis, MN). The fat supplement was administered  
121 at the back of the throat in 3 ml room-temperature doses using a 5 ml syringe at 6 h, 12 h, 24 h,  
122 and 36 h after birth. Swallowing was observed to ensure the supplement was delivered.

123  
124 Blood samples were collected from gilts at 48 h postnatal. A 22 g x 1.5-inch needle and a 3 ml  
125 serum Vacutainer® (BD Life Sciences) tube was used to collect blood by jugular venipuncture.  
126 Blood samples were refrigerated and allowed to clot overnight. Serum was collected following  
127 centrifugation (Horizon Model 614B Centrifuge; Fisher Scientific) for 25 minutes at 2,500 g and  
128 stored at -20°C until analysis.

129  
130 Gilts were euthanized approximately 48 h after birth using CO<sub>2</sub> inhalation. Following  
131 euthanasia, skin of the abdominal and genital regions was cleaned thoroughly using 70% ethanol,  
132 and vaginal swabs were taken using a cytology brush (Puritan 2196 Removable Stiff Bristle Tip  
133 Brush; QuickMedical; Issaquah, WA) by inserting the tip of the brush into the vulva angled  
134 dorsally at 45°. Once inserted to the base of the bristles, the brush was rotated 360° against the  
135 vaginal surface. Two consecutive swabs were collected from each animal, and swabs were  
136 placed in separate 15 ml sterile polypropylene conical tubes (Falcon™, Fisher Scientific, San

137 Jose, California) and immediately placed on dry ice for transport. Samples were stored in a -  
138 80°C freezer until lipid extraction and analysis.

139

140

#### 141 *Fat supplement preparation*

142 The fat supplement was created by emulsifying pork lard (Berkshire pork lard, EPIC; Austin,  
143 TX). Pork lard was used as the fat source because the fatty acid composition of lard is similar to  
144 sow colostrum [21]; Tween 80 was used as an emulsifying agent. A 30% volume/volume  
145 solution of lard/2% aqueous solution of Tween 80 was prepared using a homogenizer to  
146 microscopically distribute the lipid aggregates with low heat. The emulsion was stored at 4°C.

147

#### 148 *Milk collection*

149 Sows were milked during farrowing, and at 24 h after delivery of first piglet. For milk collection  
150 piglets were removed from the sow for approximately an hour and then 1 ml oxytocin (VetOne;  
151 Boise, ID; 20 USP/ml) was administered IM using a 20g x 1.5-inch needle into the vulva to  
152 stimulate milk letdown. Colostrum samples were collected manually from all teats and  
153 combined to create a uniform sample. Samples were stored until further analysis at -20°C.

154

#### 155 **Lipidomics Analysis**

##### 156 *Lipid extraction*

157 The Bligh & Dyer [22] lipid extraction technique was slightly modified to extract lipids from the  
158 vaginal swab samples. A volume of 500 µl distilled water was added to the conical tube  
159 containing the swab brushes and vortexed to remove biological material from the brush. The



160 brushes were removed, the sample homogenate was transferred to a new tube, and phase  
161 separation was performed by mixing with chloroform/methanol/distilled water (1:2:0.8).  
162 Samples were centrifuged, the organic phase (bottom phase) was separated from aqueous phase,  
163 divided into four aliquots, and dried in a centrifugal evaporator (Savant SpeedVac AES2010,  
164 ThermoFisher Scientific, San Jose, CA). Dried lipid extracts were stored at -20°C until mass  
165 spectrometry analysis.

166  
167 The Bligh & Dyer [22] lipid extraction technique was also used to extract lipids from 48 h serum  
168 samples from suckled and bottle-fed piglets; colostrum samples taken from all eight sows  
169 (during parturition, 6 h after first piglet born, 12 h after, and 24 h after); and milk replacer used  
170 for bottle-feeding. The procedure for these samples began at the phase separation step (i.e. no  
171 water was added to the samples).

172

### 173 *Multiple reaction monitoring (MRM)-profiling*

174 For the discovery phase of MRM-profiling, vaginal lipid extracts were pooled by treatment to  
175 determine the functional groups present in samples. Pooled samples were prepared by combining  
176 equal volumes of dried lipid extracts diluted in 200 µl of the flow injection solvent  
177 [acetonitrile/methanol/ammonium acetate 300 mM at 3:6.65:0.35 (v/v)]. Pooled sample  
178 injections (8 µl) were delivered to the micro-autosampler (G1377A) in a QQQ6410 triple  
179 quadrupole mass spectrometer (Agilent Technologies, San Jose, CA) equipped with an ESI ion  
180 source. The solvent pumped between injections (CapPump G1376A, Agilent Technologies, San  
181 Jose, CA) was acetonitrile with 1% formic acid at 10µL/min. Between sample injections,  
182 methanol/chloroform was injected to remove any remaining lipids before the next sample

183 injection. Samples were examined for fragmentation features of specified chemical classes using  
184 Precursor (Prec) and neutral loss (NL) scan modes as previously reported [15]. Scans were used  
185 to profile chemical classes, which included: phosphatidylethanolamine (PE), acylcarnitines (AC),  
186 cholesteryl esters (CE), glycosylinositolphosphoceramides (GIPC), phosphatidic acids (PA),  
187 phosphatidylcholines (PC), alkenyl-acyl PCs (ePC), sphingomyelin (SM), phosphatidylinositols  
188 (PI), phosphatidylglycerols (PG), phosphatidylserines (PS), fatty acids (FA), ceramides, sugar  
189 lipids, and glycerolipids (see Supplemental Table S1 for classes scanned). Initial data processing  
190 of the profiles obtained was carried out by converting each set of MRM-profiling method data  
191 into mzML format using MSConvert20. Next, the signal intensity for the ions present in NL and  
192 Prec mass spectra was obtained using an in-house script. Ions with values of counts >1000 were  
193 selected as parent ions and the product ion or neutral loss information was used for selecting ion  
194 pairs (1486) for the screening phase.

195

196 For Screening Phase I, individual sample extracts were analyzed for the MRMs identified in the  
197 discovery phase (1486), as well as triacylglycerol (TAG) MRMs (Supplemental Table S2). TAG  
198 have no polar head or diagnostic functional group fragment, precluding them from the discovery  
199 step of analysis. During screening phase, TAG were profiled using parent ions and a product ion  
200 related to the presence of specific fatty acyl residues (16:0, 16:1, 18:0, 18:1, 18:2, and 20:4).  
201 MRMs identified in the discovery step and TAG MRMs were divided into 8 groups, or 8  
202 screening *methods*. The methods were organized by factors such as lipid class to optimize the  
203 efficiency of the machine and to limit the number of precursor ion/product ion pairs screened per  
204 sample injection. Thus, for each of the 8 methods, intensities of approximately 250 MRMs were  
205 measured per 8 $\mu$ l sample injection. Since cellular content in each sample may vary when using

206 swabs, prior to screening lipid extract amount was recorded across samples by scanning for the  
207 precursor ion of  $m/z$  184, which profiles the most abundant lipids in cells, namely PC and SM  
208 lipids. In this way, intensities for PC lipids were measured, and samples were diluted using the  
209 same flow injection solvent to achieve a similar concentration for comparative relative analysis.

210

211 Data from Screening Phase I were uploaded into MetaboAnalyst 4.0 ([www.metaboanalyst.ca](http://www.metaboanalyst.ca)) to  
212 identify MRMs that best discriminated between suckled and bottle-fed gilts. A second set of  
213 MRMs were selected based on discrimination between gilts with and without fat  
214 supplementation. There were 146 MRMs identified that best discriminated between suckled and  
215 bottle-fed vaginal lipids (S and SF piglets versus B and BF piglets, respectively), and 197 MRMs  
216 that discriminated not-supplemented and fat supplemented vaginal lipids (S and B piglets versus  
217 SF and BF piglets, respectively). The 146 MRMs (Supplemental Table S3) and 197 MRMs  
218 (Supplemental Table S4) were organized into two distinct methods (Method 1 and Method 2,  
219 respectively) for Screening Phase II analysis.

220

221 Method 1 and Method 2 were used to evaluate the vaginal lipids from all piglets in Screening  
222 Phase II. The resulting ion pair intensities were normalized to reflect percent intensity for  
223 subsequent comparative analysis. These data were used to verify the effectiveness of each  
224 method to differentiate between piglets that were: A.) suckled or bottle-fed, or; B.) fat  
225 supplemented or not. Data were uploaded in MetaboAnalyst 4.0 by method for statistical  
226 analysis to evaluate the potential effectiveness of selected MRMs as biomarkers for  
227 distinguishing treatment groups.

228

229 *MRM-profiling data analysis in MetaboAnalyst*

230 Ion intensities of MRMs from the screening phase were used to calculate the relative ion  
231 intensity of ion pairs in each sample and these data was uploaded into MetaboAnalyst 4.0 [23]  
232 and normalized using autoscaling. The Biomarker Analysis tool was used to identify MRMs that  
233 discriminated between suckled versus bottle-fed gilts and fat supplemented versus non-fat  
234 supplemented gilts. Biomarker analysis tools applied included principal component analysis,  
235 partial least square-discriminant analysis, and classical univariate receiver operating  
236 characteristic (ROC) curve analysis. Using data from Screening Phase I, a cut-off area-under-the-  
237 curve (AUC) value of 0.70 and 0.80 was used to select MRMs to discriminate between vaginal  
238 lipids of piglets suckled versus bottle-fed (Method 1), and those with and without fat  
239 supplementation (Method 2).

240

241 *Lipid identification*

242 Precursor ion/product ion pairs were tentatively assigned identities using attributions in Metlin  
243 (<https://metlin.scripps.edu>) and Lipid Maps (<http://www.lipidmaps.org/>). Potential identities  
244 were assigned using the associated functional group and biological information. Metlin MS/MS  
245 Spectrum Search was used with the following settings: precursor ion mass from the mass  
246 spectrometer reading for  $m/z$  value, maximum tolerance at 100, collision energy at 10 eV or 20  
247 eV, MS/MS tolerance at 0.5, peaks included the product ion mass  $m/z$  with an intensity of 100,  
248 positive mode, and M+H was selected for the adduct. If the suspected ion pair was a TAG,  
249 M+NH<sub>4</sub> was also selected as an adduct to account for ammonium acetate.

250

251 Phospholipids were assigned identity by their class (PS, PI, PE, or PC), the number of carbon  
252 atoms in the esterified fatty acid, and the number of carbon-carbon double bonds present in the  
253 molecule, eg. PE(34:4). TAGs were similarly assigned tentative attributions. First, the number of  
254 carbon atoms in each fatty acyl chain was summed, and the number of carbon-carbon double  
255 bonds was assigned. Since searches in Lipid Maps can only be performed using neutral masses,  
256 and ammonium acetate was present in the injection solvent, TAGs were detected as ammonium  
257 adducts. For this reason, 18 mass units ( $\text{NH}_4$ ) was subtracted from the parent mass observed in  
258 the MS analysis to obtain the neutral mass for each TAG. Other lipids were searched by  
259 accounting for a single mass unit loss to account for a hydrogen ion only. Results were narrowed  
260 using the associated functional group and biological information, and attributions were assigned  
261 where possible.

262

### 263 *Swab, serum, and colostrum correlation analysis*

264 Method 1 was also used to analyze serum lipids collected from the S and B animals, milk  
265 replacer, and colostrum at 0 h, 6 h, 12 h, and 24 h post-parturition. These resulting intensities  
266 were converted to percent intensity for comparative analysis. Pearson's correlation coefficient  
267 analysis of percent intensities between milk and serum samples, milk and vaginal swab samples,  
268 and serum and swab samples was performed for each of the 38 most discriminating MRMs from  
269 Method 1 using the CORR procedure of SAS 9.4 (Cary, NC). Variables compared were percent  
270 intensities of: 48 h swab samples and 48 h serum samples; 48 h swab samples and respective  
271 source of nutrition at 24 h; and 48 h serum samples and respective source of nutrition at 24 h. Six  
272 MRMs overlapped as highly correlating between source of nutrition and swab lipids, and source  
273 of nutrition and serum lipids. Percent ion intensities were compared between milk replacer and

274 colostrum for those six MRMs. Statistics were not performed on colostrum versus milk replacer  
275 since ion intensity results were from only one sample of milk replacer. In addition, MIXED  
276 procedure of SAS 9.4 (Cary, NC) was used to analyze the statistical difference in ion intensities  
277 of the six most highly correlated MRMs between suckled versus bottle-fed gilt serum, as well as  
278 suckled versus bottle-fed gilt swab samples to compare.

279

280

281

282

283

284

285

286

287

## 288 **Results**

### 289 *Effect of postnatal diet on vaginal lipid profiles.*

290 The discovery phase identified a total of 1486 unique MRMs in pooled isolates from vaginal  
291 swabs. Glycerolipids with saturated bonds encompassed 37% of identified lipids (Figure 1A;  
292 Supplemental Table S2). Glycerolipids with unsaturated bonds were next in abundance with 25%  
293 of identified lipids, and acylcarnitines were third most abundant (15.81%). Intensities of the 1486  
294 MRMs identified in the discovery phase, plus approximately 400 triacylglycerols (TAGs), were  
295 measured in individual samples in Screening Phase I (Supplemental Table S2). Screening Phase I  
296 analysis found 146 MRMs (Supplemental Table S3) that best discriminated between suckled and  
297 bottle-fed vaginal lipids, and 197 MRMs (Supplemental Table S4) that best discriminated  
298 between vaginal lipids of gilts with and without fat supplementation.

299

300 For Screening Phase II, the 146 MRMs that distinguished between suckled and bottle-fed  
301 treatments were organized into Method 1 analysis, which consisted primarily of TAGs,  
302 acylcarnitines, and glycerolipids (Figure 1B). Tentative attributions were assigned to 91/146  
303 lipids in Method 1 (Supplemental Table S5). Principal component and hierarchical cluster  
304 analysis showed distinct clusters by treatment groups of suckled versus bottle-fed milk replacer  
305 (Figure 2A and 2B). ROC curve analysis identified 18 MRMs with AUC values greater than  
306 0.90. Of the 18, 15 were assigned tentative attributions, which included hydroxy octadecanoyl  
307 carnitine, two TAG(46:1), TAG(48:2), TAG(48:1), PG(36:2)/PI(30:4), PC(36:7), TAG(44:1),  
308 PG(34:6), PE(34:4), PE(36:5), PE(38:5), two TAG(44:0), and TAG(48:3). The proportion of  
309 TAGs identified in this group (44%) was greater than proportion of TAGs present in the entire

310 list of Method 1 ion pairs (27%). The 20 most discriminating lipids recovered from the vaginal  
311 swabs showed a greater relative abundance in most bottle-fed versus suckled gilts (Figure 2B).  
312  
313 Hierarchical cluster and principal component analysis of the effect of fat supplementation on  
314 lipidome profiles showed several groupings, with some distinction between plus and minus fat  
315 supplemented gilts (Figure 2C and 2D). The 197 MRMs that most distinguished between fat  
316 supplemented piglets and non-supplemented piglets and selected for Method 2 Screening Phase  
317 II analysis were primarily glycerolipids (Figure 1C). ROC curve analysis identified 15 MRMs  
318 with AUC values ranging from 0.65 to 0.78. Mean ion intensity of these MRMs was compared  
319 between treatments, and overall treatment effects ( $p < 0.05$ ) were found for a cholesteryl ester  
320 and a ceramide, with numerical differences between treatments in two glycerol lipids with EPA  
321 residues (Figure 3).

322

### 323 *Correlation of lipids isolated from Swabs, Blood Serum, and Colostrum-Milk Replacer*

324 To investigate whether there was a relationship between piglet nutrition and either serum or  
325 vaginal lipidome profiles, lipids from piglet serum, sow colostrum, and milk replacer were  
326 analyzed using Method 1 MRMs. Linear regression analysis was used to determine if there was a  
327 relationship between intensities of the top 38 MRMs ( $AUC > 0.8$ ) that discriminated most  
328 between vaginal swab samples of S and B groups with intensity in piglet serum and nutrition  
329 source (sow colostrum or milk replacer; Table 1). The correlation coefficient between twelve  
330 MRMs in swab and milk samples was highly significant ( $r > 0.60$  and  $P < 0.01$ ), and included:  
331 three PE lipids; a PG lipid; a PC lipid; five TAGs; stearyl carnitine, hexadecanedioic acid mono-  
332 L-carnitine ester; and PG (36:2)/PI(30:4). Analysis of relationship of lipid intensities by nutrition



333 source and serum found seven MRMs were significant including three PE lipids, one PG lipid,  
334 and three TAGs. One MRM, related to TAG (48:3), had a negative correlation between nutrition  
335 source and serum ( $r = -0.62$  and  $P = 0.01$ ).

336

337 Six MRMs overlapped amongst the strongest correlations between source of nutrition and serum  
338 and between source of nutrition and swab [tentative lipid attributions: PE (34:4), PE(36:5),  
339 PG(34:6), TAG(46:1), PE(38:5), and TAG(44:0)]. Levels of all six lipids were 159-fold to 2.41-  
340 fold (Figure 4 and Supplemental Figure S2) higher in milk replacer than colostrum, which  
341 correlated to significantly higher levels across all serum and swab samples of bottle-fed versus  
342 suckled animals (Figure 4).

343

344

345

346

347

348

## 349 **Discussion**

350 Screening phase II Method 1 analysis aimed at identifying lipids that discriminated between gilts  
351 which suckled sow colostrum versus gilts fed milk replacer the first 48 h postnatal. ROC curve  
352 analysis found 18 lipids with  $AUC \geq 0.9$ . The AUC value is a measure of the usefulness of a  
353 test, in terms of sensitivity and specificity [24]. Biomarkers with AUC values from 0.9-1.0 are  
354 excellent, 0.8-0.9 are good, 0.7-0.8 are fair, and 0.6-0.7 are poor [25]. The 18 lipids are thus  
355 excellent candidate markers to detect differences between suckled gilts compared to those that

356 consumed only milk replacer. The most discriminatory lipids identified in Method 1 exhibited  
357 higher intensities in bottle-fed animals when compared to suckled gilts. We found a positive  
358 correlation of ion intensities of MRMs between nutrition source and swabs of suckled versus  
359 bottle-fed gilts, and nutrition source and serum of suckled versus bottle-fed gilts. Comparative  
360 analysis of mean ion intensities of the most highly correlated lipids found much higher intensities  
361 of lipid signals in milk replacer than in 24 h colostrum samples, and correspondingly higher  
362 intensities in serum and vaginal swabs of bottle-fed animals relative to suckled gilts.

363

364 The high correlation of MRM intensities between nutrition source and swab were primarily driven  
365 by lipids that were significantly more abundant in milk replacer than colostrum samples. These  
366 findings demonstrate that lipid content in milk replacer formulas changes the composition of  
367 neonate tissues, and component fats may become part of the tissues. Lipids are bioactive  
368 molecules, and play a central role in metabolism and influence and modulate cell function. For  
369 example, lipids from the diet function in cytokine and (steroid) hormone synthesis, cell  
370 differentiation and growth, cell membrane structure, myelination, signal transmission, and are  
371 substrates used for prostaglandin synthesis. Fatty acids and their metabolites, such as eicosanoids,  
372 have a major signaling function and regulate gene transcription by serving as transcriptional co-  
373 activators, with polyunsaturated fatty acids activating the transcription factor peroxisome  
374 proliferator-activated receptors [26, 27]. Thus, fatty acid composition of diet has the potential to  
375 affect significant biological response in the neonate, which in turn can affect the course of neonatal  
376 development and health. In humans, there is evidence that the quality of dietary lipids provided  
377 to infants has a marked impact on health outcomes [28], with our study supporting that dietary  
378 lipids became components of tissues. Although infant formula has been amended some, currently

379 available products continue to be markedly different from breast milk in their lipid composition;  
380 these differences might be of importance for infant health, development and long-term fertility  
381 [28]. Correlation of lipids in nutrition source (milk replacer and colostrum) with serum and swab,  
382 suggest some lipids may be directly absorbed without modification in the gastrointestinal tract,  
383 potentially prior to intestinal barrier closure, which is within 36-48 h after birth [3, 29-31]. Thus  
384 this period of time may be viewed as either a window of opportunity or vulnerability for  
385 influencing neonate's developmental program.

386

387 Functional groups of Screening Phase II Method 2 analysis were primarily glycerol lipids with  
388 both saturated and unsaturated FA residues. Of the most discriminatory lipids, four MRMs had  
389 AUC values between 0.7 and 0.8, thus achieving a biomarker utility rating of fair [25]. Two of  
390 these were glycerol lipids with eicosapentaenoic acid (EPA) residues, one was a ceramide, and the  
391 final was a cholesteryl ester. Mean intensity of the cholesteryl ester was significantly higher in  
392 suckled plus fat supplemented gilts versus non-supplemented gilts. Unfortunately, MRM-profiling  
393 was not completed with the fat supplement. Thus we can only speculate that the higher cholesteryl  
394 ester content in swabs was a response to the higher fat diet. Two glycerol lipids with EPA residues  
395 and ceramide were numerically lower in vaginal swabs of fat supplemented gilts. EPA is either  
396 absorbed from the diet or synthesized from the essential fatty acids linoleic and alpha linoleic acid.  
397 A potential explanation of these findings is that direct supplementation of piglets with animal fats  
398 lowered the bioavailability of EPA (or linoleic and alpha linoleic acids). In the mature gut,  
399 triglycerides and phospholipids are hydrolyzed by pancreatic lipase, but the ethyl ester of EPA  
400 requires additional digestion with bile salt-dependent lipase [32]. Digestion and absorption of  
401 EPA is thus considerably lower than triglycerides and phospholipids, and dependent on high-fat

402 content in meals, which stimulates bile-salt dependent lipase and enhanced absorption [32]. In  
403 porcine and human neonates the levels of pancreatic lipase and bile acids are much lower than at  
404 maturity [33]. Thus, despite the higher lipid content of fat supplement treated gilts, the low  
405 availability of bile acids levels may have limited EPA absorption. Further research into how lipids  
406 ingested by early postnatal gilts are metabolized and used in the reproductive tract is needed.

407

## 408 **Conclusion**

409 Vaginal swab lipidomes were significantly affected by composition of early postnatal diet.  
410 Multiple lipid molecules were differentially abundant between gilts exposed to colostrum versus  
411 gilts fed milk replacer and gilts fed with and without fat supplement the first 48 h of life. Several  
412 lipids collected from vaginal swabs were highly correlated with the nutrition source a piglet  
413 ingested. Lipids more abundant in milk replacer appeared to be driving the association in the  
414 current study. These findings demonstrated that lipid composition of neonatal diet affects tissue  
415 composition and thus may affect development, function and overall health and fertility.  
416 Moreover, while data support the efficacy of using MRM-lipid profiling of vaginal swabs to  
417 detect differences in early postnatal nutritional exposures, findings also highlight a need to  
418 modify our approach to determine if biomarkers of colostrum intake can be specifically  
419 identified in vaginal swab samples.

420

421

## REFERENCES

- 422  
423
- 424 1. Peaker M. The mammary gland in mammalian evolution: a brief commentary on some of  
425 the concepts. *Journal of mammary gland biology and neoplasia* 2002; 7:347-353.
  - 426 2. Dividich JL, Rooke JA, Herpin P. Nutritional and immunological importance of  
427 colostrum for the new-born pig. *J. Agric. Sci.* 2005; 143:469-485.
  - 428 3. Bartol FF, Wiley AA, Bagnell CA. Relaxin and Maternal Lactocrine Programming of  
429 Neonatal Uterine Development. *Annals of the New York Academy of Sciences* 2009;  
430 1160:158-163.
  - 431 4. Bagnell CA, Yan W, Wiley AA, Bartol FF. Effects of Relaxin on Neonatal Porcine  
432 Uterine Growth and Development. *Annals of the New York Academy of Sciences* 2005;  
433 1041:248-255.
  - 434 5. Gray CA, Bazer FW, Spencer TE. Effects of Neonatal Progestin Exposure on Female  
435 Reproductive Tract Structure and Function in the Adult Ewe1. *Biology of Reproduction*  
436 2001; 64:797-804.
  - 437 6. Bartol FF, Wiley AA, Spencer TE, Vallet JL. Early uterine development in pigs. *Journal*  
438 *of Reproduction and fertility supplement* 1993; 48:99-116.
  - 439 7. Yan W, Chen J, Wiley AA, Crean-Harris BD, Bartol FF, Bagnell CA. Relaxin (RLX) and  
440 estrogen affect estrogen receptor  $\alpha$ , vascular endothelial growth factor, and RLX receptor  
441 expression in the neonatal porcine uterus and cervix. *Reproduction* 2008; 135:705-712.
  - 442 8. Yan W, Wiley AA, Bathgate RAD, Frankshun A-L, Lasano S, Crean BD, Steinetz BG,  
443 Bagnell CA, Bartol FF. Expression of LGR7 and LGR8 by Neonatal Porcine Uterine  
444 Tissues and Transmission of Milk-Borne Relaxin into the Neonatal Circulation by  
445 Suckling. *Endocrinology* 2006; 147:4303-4310.

- 446 9. Camp ME, Wiley AA, Boulos MB, Rahman KM, Bartol FF, Bagnell CA. Effects of age,  
447 nursing, and oral IGF1 supplementation on neonatal porcine cervical development.  
448 *Reproduction* 2014; 148:441-451.
- 449 10. Miller DJ, Wiley AA, Chen JC, Bagnell CA, Bartol FF. Nursing for 48 Hours from Birth  
450 Supports Porcine Uterine Gland Development and Endometrial Cell Compartment-  
451 Specific Gene Expression. *Biology of Reproduction* 2013; 88.
- 452 11. Bartol FF, Wiley AA, Miller DJ, Silva AJ, Roberts KE, Davolt MLP, Chen JC,  
453 Frankshun AL, Camp ME, Rahman KM, Vallet JL, Bagnell CA. Lactation Biology  
454 Symposium: lactocrine signaling and developmental programming. *Journal of animal*  
455 *science* 2013; 91:696.
- 456 12. Bartol FF, Wiley AA, Miller DJ, Silva AJ, Roberts KE, Davolt MLP, Chen JC,  
457 Frankshun A-L, Camp ME, Rahman KM, Vallet JL, Bagnell CA. LACTATION  
458 BIOLOGY SYMPOSIUM: Lactocrine signaling and developmental programming.  
459 *Journal of Animal Science* 2013; 91:696-705.
- 460 13. Chen JC, Frankshun A-L, Wiley AA, Miller DJ, Welch KA, Ho T-Y, Bartol FF, Bagnell  
461 CA. Milk-borne lactocrine-acting factors affect gene expression patterns in the  
462 developing neonatal porcine uterus. *Reproduction* 2011; 141:675-683.
- 463 14. Cai Y. Revisiting old vaginal topics: conversion of the Müllerian vagina and origin of  
464 the "sinus" vagina. *International Journal of Developmental Biology* 2009; 53:925-934.
- 465 15. Casey T, Harlow K, Ferreira CR, Sobreira TJP, Schinckel A, Stewart K. The potential of  
466 identifying replacement gilts by screening for lipid biomarkers in reproductive tract  
467 swabs taken at weaning. *Journal of Applied Animal Research* 2018; 46:667-676.

- 468 16. Casey T, Harlow K, Ferreira CR, Sobreira TJ, Schinckel A, Stewart K. The potential of  
469 identifying replacement gilts by screening for lipid biomarkers in reproductive tract  
470 swabs taken at weaning. *Journal of Applied Animal Research* 2018; 46:667-676.
- 471 17. Benevenga N, Steinman-Goldsworthy J, Crenshaw T, Odle J. Utilization of Medium-  
472 Chain Triglycerides by Neonatal Piglets: I. Effects on Milk Consumption and Body Fuel  
473 Utilization1. *Journal of animal science* 1989; 67:3331-3339.
- 474 18. Odle J, Benevenga N, Crenshaw T. Utilization of medium-chain triglycerides by neonatal  
475 piglets: II. Effects of even-and odd-chain triglyceride consumption over the first 2 days of  
476 life on blood metabolites and urinary nitrogen excretion. *Journal of Animal Science*  
477 1989; 67:3340-3351.
- 478 19. Le Dividich J. Effect of fat content of colostrum on voluntary colostrum intake and fat  
479 utilization in newborn pigs. *Journal Of Animal Science* 1997; 75:707.
- 480 20. Su G, Zhou X, Wang Y, Chen D, Chen G, Li Y, He J. Effects of plant essential oil  
481 supplementation on growth performance, immune function and antioxidant activities in  
482 weaned pigs. *Lipids Health Dis* 2018; 17:139.
- 483 21. Wieland TM, Lin X, Odle J. Utilization of medium-chain triglycerides by neonatal pigs:  
484 effects of emulsification and dose delivered. *Journal of animal science* 1993; 71:1863-  
485 1868.
- 486 22. Bligh E, Dyer W. A rapid method of total lipid extraction and purification. *Can J*  
487 *Biochem Physiol* 1959; 37:911-917.
- 488 23. Chong J, Soufan O, Li C, Caraus I, Li S, Bourque G, Wishart DS, Xia J. MetaboAnalyst  
489 4.0: towards more transparent and integrative metabolomics analysis. *Nucleic acids*  
490 *research* 2018.

- 491 24. Faraggi D, Reiser B, Schisterman EF. ROC curve analysis for biomarkers based on  
492 pooled assessments. *Statistics in Medicine* 2003; 22:2515-2527.
- 493 25. Xia J, Broadhurst D, Wilson M, Wishart D. Translational biomarker discovery in clinical  
494 metabolomics: an introductory tutorial. *Metabolomics* 2013; 9:280-299.
- 495 26. Forman BM, Tontonoz P, Chen J, Brun RP, Spiegelman BM, Evans RM. 15-Deoxy-  
496  $\Delta^{12,14}$ -Prostaglandin J2 is a ligand for the adipocyte determination factor PPAR $\gamma$ . *Cell*  
497 1995; 83:803-812.
- 498 27. Kliewer SA, Sundseth SS, Jones SA, Brown PJ, Wisely GB, Koble CS, Devchand P,  
499 Wahli W, Willson TM, Lenhard JM, Lehmann JM. Fatty acids and eicosanoids regulate  
500 gene expression through direct interactions with peroxisome proliferator-activated  
501 receptors  $\alpha$  and  $\gamma$ . *Proceedings of the National Academy of Sciences* 1997; 94:4318-4323.
- 502 28. Delplanque B, Gibson R, Koletzko B, Lapillonne A, Strandvik B. Lipid Quality in Infant  
503 Nutrition: Current Knowledge and Future Opportunities. *Journal of pediatric*  
504 *gastroenterology and nutrition* 2015; 61:8-17.
- 505 29. Lanza I, Shoup DI, Saif LJ. Lactogenic immunity and milk antibody isotypes to  
506 transmissible gastroenteritis virus in sows exposed to porcine respiratory coronavirus  
507 during pregnancy. *Am J Vet Res* 1995; 56:739-748.
- 508 30. Drew MD, Bevandick I, Owen BD. Artificial rearing of colostrum-deprived piglets using  
509 iron chelators: The effects of oral administration of EDDHA with and without bovine or  
510 porcine immunoglobulins on piglet performance and iron-metabolism. *Can. J. Anim. Sci.*  
511 1990; 70:655-666.
- 512 31. Bourne FJ, Newby TJ, Evans P, Morgan K. The immune requirements of the newborn  
513 pig and calf. *Ann Rech Vet* 1978; 9:239-244.



- 514 32. Davidson MH, Johnson J, Rooney MW, Kyle ML, Kling DF. A novel omega-3 free fatty  
515 acid formulation has dramatically improved bioavailability during a low-fat diet  
516 compared with omega-3-acid ethyl esters: the ECLIPSE (Epanova® compared to  
517 Lovaza® in a pharmacokinetic single-dose evaluation) study. *Journal of clinical  
518 lipidology* 2012; 6:573-584.
- 519 33. Hamosh M, Bitman J, Wood DL, Hamosh P, Mehta N. Lipids in milk and the first steps  
520 in their digestion. *Pediatrics* 1985; 75:146-150.

521

522

523 **Figure Legends.**

524 Figure 1. Lipid class distribution of MRMs: (A) detected in initial discovery phase; (B) Selected  
525 for method 1; and (C) Selected for method 2.

526

527 Figure 2. (A) Principal component analysis and (B) heat map of lipids selected for Method 1;  
528 within the hierarchical analysis, red signifies bottle-fed animals (B and BF) and green signifies  
529 suckled animals (S and SF). (C) Principal component analysis and (D) heat map of lipids  
530 selected for Method 2; within the hierarchical analysis, red signifies fat supplemented (SF and  
531 BF) and green signifies not supplemented (S and B) animals. In the heatmap, blue indicates  
532 lower ion intensities and red indicates higher ion intensities. MRMs are on the right and animal  
533 ID is on the bottom.

534

535 Figure 3. Mean ion intensity of precursor-product ion MRMs of (A) cholesteryl ester 425.4-  
536 >369; (B) ceramide 557.4->282.2; (C) glycerolipid containing eicosapentaenoic acid residue  
537 631.2->283.9; and (D) glycerolipid containing eicosapentaenoic acid residue 780.2->432.9  
538 measure in lipid extracts of vaginal swabs taken from bottle fed (B), bottle fed and fat  
539 supplemented (BF), suckled by sow (S) and suckled by sow plus fat supplemented (SF) for 48 h  
540 postnatal. Differing letters indicate statistical difference at  $p < 0.05$ ; and (\*) indicates an overall  
541 fat supplement treatment effect.

542

543 Figure 4: Comparison of relative mean intensity of PE (34:4), 712.5->495.19 in (A) nutrition  
544 source (24 h colostrum sample versus milk replacer-MR); (B) serum of suckled-S versus bottle  
545 fed milk replacer-B; and (C) vaginal swab samples in S versus B gilts. Relative mean intensity of

546 PE (36:5), 738.5->521.19 in (D) nutrition source (24 h colostrum sample versus milk replacer-  
547 MR); (E) serum of suckled-S versus bottle fed milk replacer-B; and (F) vaginal swab samples in  
548 S versus B gilts. Relative mean intensity of PG (34:6), 739.6->522.29 in (G) nutrition source (24  
549 h colostrum sample versus milk replacer-MR); (H) serum of suckled-S versus bottle fed milk  
550 replacer-B; and (I) vaginal swab samples in S versus B gilts. Differing letters indicate statistical  
551 difference at  $p < 0.005$ .

552 **Supplemental Data Legends**

553 **Supplemental Figure S1.** Study design and work flow.

554

555 **Supplemental Figure S2.** Comparison of relative mean intensity of TAG(46:1) in (A) nutrition

556 source (24 h colostrum sample versus milk replacer-MR); (B) serum of suckled-S versus bottle

557 fed milk replacer-B; and (C) vaginal swab samples in S versus B gilts. Relative mean intensity of

558 TAG(44:0) in (E) nutrition source (24 h colostrum sample versus milk replacer-MR); (F) serum

559 of suckled-S versus bottle fed milk replacer-B; and (G) vaginal swab samples in S versus B gilts.

560 Relative mean intensity of PE (38:5) in (H) nutrition source (24 h colostrum sample versus milk

561 replacer-MR); (I) serum of suckled-S versus bottle fed milk replacer-B; and (J) vaginal swab

562 samples in S versus B gilts. Differing letters indicate statistical difference at  $p < 0.005$ .

563

564 **Supplemental Table S1:** Neutral Loss and Precursor Scan Modes Used for Discovery of MRMs

565

566 **Supplemental Table S2:** MRMs Selected After Discovery Step For 8 Methods

567

568 **Supplemental Table S3.** Selected MRMs for Method 1 (Bottle-fed versus Suckled)

569

570 **Supplemental Table S4.** Selected MRMs for Method 2 (Fat supplemented versus Not fat

571 supplement)

572

573 **Supplemental Table S5.** Tentative Attributions for Method 1

574

575 Table 5. Pearson correlation coefficients of 38 MRMs with highest AUC values. Bold values  
 576 indicate either  $r > |0.60|$  or  $P\text{-value} < 0.01$ .

577

| MRM ID        | Tentative ID Attribution                                       | Serum vs Nutrition Source |                 | Serum vs Swab |                 | Swab vs Nutrition Source |                 |
|---------------|----------------------------------------------------------------|---------------------------|-----------------|---------------|-----------------|--------------------------|-----------------|
|               |                                                                | <i>r</i>                  | <i>P</i> -value | <i>r</i>      | <i>P</i> -value | <i>r</i>                 | <i>P</i> -value |
| 442.4-59.1    | hydroxy octadecanoyl carnitine                                 | -0.15                     | 0.56            | 0.36          | 0.16            | -0.43                    | 0.09            |
| 514.5-131.2   | Not identified                                                 | -0.04                     | 0.89            | 0.12          | 0.67            | -0.22                    | 0.42            |
| 640.4-339.1   | Not identified                                                 | 0.15                      | 0.58            | -0.29         | 0.26            | 0.09                     | 0.73            |
| 678.6-184.2   | PC(28:0)/PS(28:1)                                              | 0.28                      | 0.28            | 0.13          | 0.63            | <b>0.59</b>              | <b>0.01</b>     |
| 712.5-495.2   | PE(34:4)                                                       | <b>0.75</b>               | <b>0.001</b>    | <b>0.51</b>   | <b>0.04</b>     | <b>0.76</b>              | <b>0.001</b>    |
| 738.5-521.2   | PE(36:5)                                                       | <b>0.66</b>               | <b>0.005</b>    | 0.43          | 0.09            | <b>0.71</b>              | <b>0.002</b>    |
| 739.6-522.3   | PG(34:6)                                                       | <b>0.69</b>               | <b>0.003</b>    | 0.28          | 0.29            | <b>0.66</b>              | <b>0.005</b>    |
| 766.5-521.2   | TAG(44:1)                                                      | <b>0.71</b>               | <b>0.002</b>    | 0.39          | 0.13            | <b>0.61</b>              | <b>0.01</b>     |
| 766.5-549.2   | PE(38:5)                                                       | <b>0.76</b>               | <b>0.0006</b>   | 0.42          | 0.11            | <b>0.71</b>              | <b>0.002</b>    |
| 768.4-495.1   | TAG(44:0)                                                      | <b>0.67</b>               | <b>0.005</b>    | 0.27          | 0.32            | <b>0.67</b>              | <b>0.005</b>    |
| 768.5-523.2   | TAG(44:0)                                                      | <b>0.61</b>               | <b>0.01</b>     | 0.11          | 0.71            | <b>0.63</b>              | <b>0.01</b>     |
| 776.1-184.2   | PC(36:7)                                                       | 0.14                      | 0.59            | 0.13          | 0.62            | <b>0.73</b>              | <b>0.001</b>    |
| 793.7-520.4   | Not identified                                                 | <b>0.49</b>               | <b>0.05</b>     | 0.25          | 0.34            | <b>0.59</b>              | <b>0.01</b>     |
| 794.5-521.2   | TAG(46:1)                                                      | <b>0.63</b>               | <b>0.008</b>    | 0.38          | 0.14            | <b>0.62</b>              | <b>0.01</b>     |
| 794.5-549.2   | TAG(46:1)                                                      | <b>0.57</b>               | <b>0.02</b>     | 0.42          | 0.11            | <b>0.67</b>              | <b>0.004</b>    |
| 818.8-519.8   | TAG(48:3)                                                      | 0.43                      | 0.09            | 0.42          | 0.11            | <b>0.51</b>              | <b>0.05</b>     |
| 820.7-521.4   | TAG(48:2)                                                      | 0.32                      | 0.22            | 0.32          | 0.23            | 0.36                     | 0.17            |
| 822.8-521.8   | TAG(48:1)                                                      | -0.26                     | 0.32            | 0.22          | 0.42            | -0.15                    | 0.57            |
| 400.4-101.1   | Not identified                                                 | 0.06                      | 0.81            | 0.22          | 0.42            | 0.13                     | 0.62            |
| 428.4-85.1    | Stearoylcarnitine, hexadecanedioic acid mono-L-carnitine ester | -0.12                     | 0.65            | 0.07          | 0.78            | <b>0.69</b>              | <b>0.003</b>    |
| 476.5-177.2   | Not identified                                                 | 0.26                      | 0.32            | 0.04          | 0.87            | -0.19                    | 0.48            |
| 638.5-339.2   | Not identified                                                 | -0.11                     | 0.69            | -0.39         | 0.13            | -0.31                    | 0.24            |
| 640.29-340.99 | Not identified                                                 | 0.35                      | 0.18            | -0.03         | 0.91            | 0.43                     | 0.1             |
| 706.7-184.2   | PC(30:0)/PS(30:1)                                              | 0.43                      | 0.09            | <b>0.49</b>   | <b>0.05</b>     | <b>0.61</b>              | <b>0.01</b>     |
| 766.5-495.2   | TAG(44:1)                                                      | 0.42                      | 0.11            | 0.14          | 0.61            | <b>0.69</b>              | <b>0.003</b>    |
| 767.1-549.8   | TAG(44:1)                                                      | <b>0.54</b>               | <b>0.03</b>     | -0.07         | 0.78            | <b>0.49</b>              | <b>0.05</b>     |
| 774.5-184.2   | PC(36:8)/PE(38:1)                                              | 0.34                      | 0.19            | 0.11          | 0.68            | <b>0.53</b>              | <b>0.03</b>     |
| 775.8-184.2   | PG(36:2)/PI(30:4)                                              | 0.11                      | 0.67            | -0.02         | 0.93            | <b>0.65</b>              | <b>0.006</b>    |
| 792.5-521.2   | TAG(46:2)                                                      | -0.45                     | 0.08            | 0.11          | 0.69            | -0.16                    | 0.53            |
| 795.5-550.2   | TAG(48:6)/PG(38:6)                                             | 0.11                      | 0.69            | 0.22          | 0.42            | <b>0.54</b>              | <b>0.03</b>     |
| 796.1-522.8   | Not identified                                                 | 0.29                      | 0.27            | 0.14          | 0.67            | 0.15                     | 0.58            |
| 796.5-579.2   | TAG(46:0)                                                      | 0.45                      | 0.07            | 0.007         | 0.97            | 0.31                     | 0.23            |
| 808.6-509.3   | PC(38:5)                                                       | 0.26                      | 0.34            | -0.01         | 0.95            | 0.25                     | 0.35            |
| 818.8-521.8   | TAG(48:3)                                                      | <b>-0.62</b>              | <b>0.01</b>     | 0.26          | 0.32            | -0.23                    | 0.41            |



Figure 4.

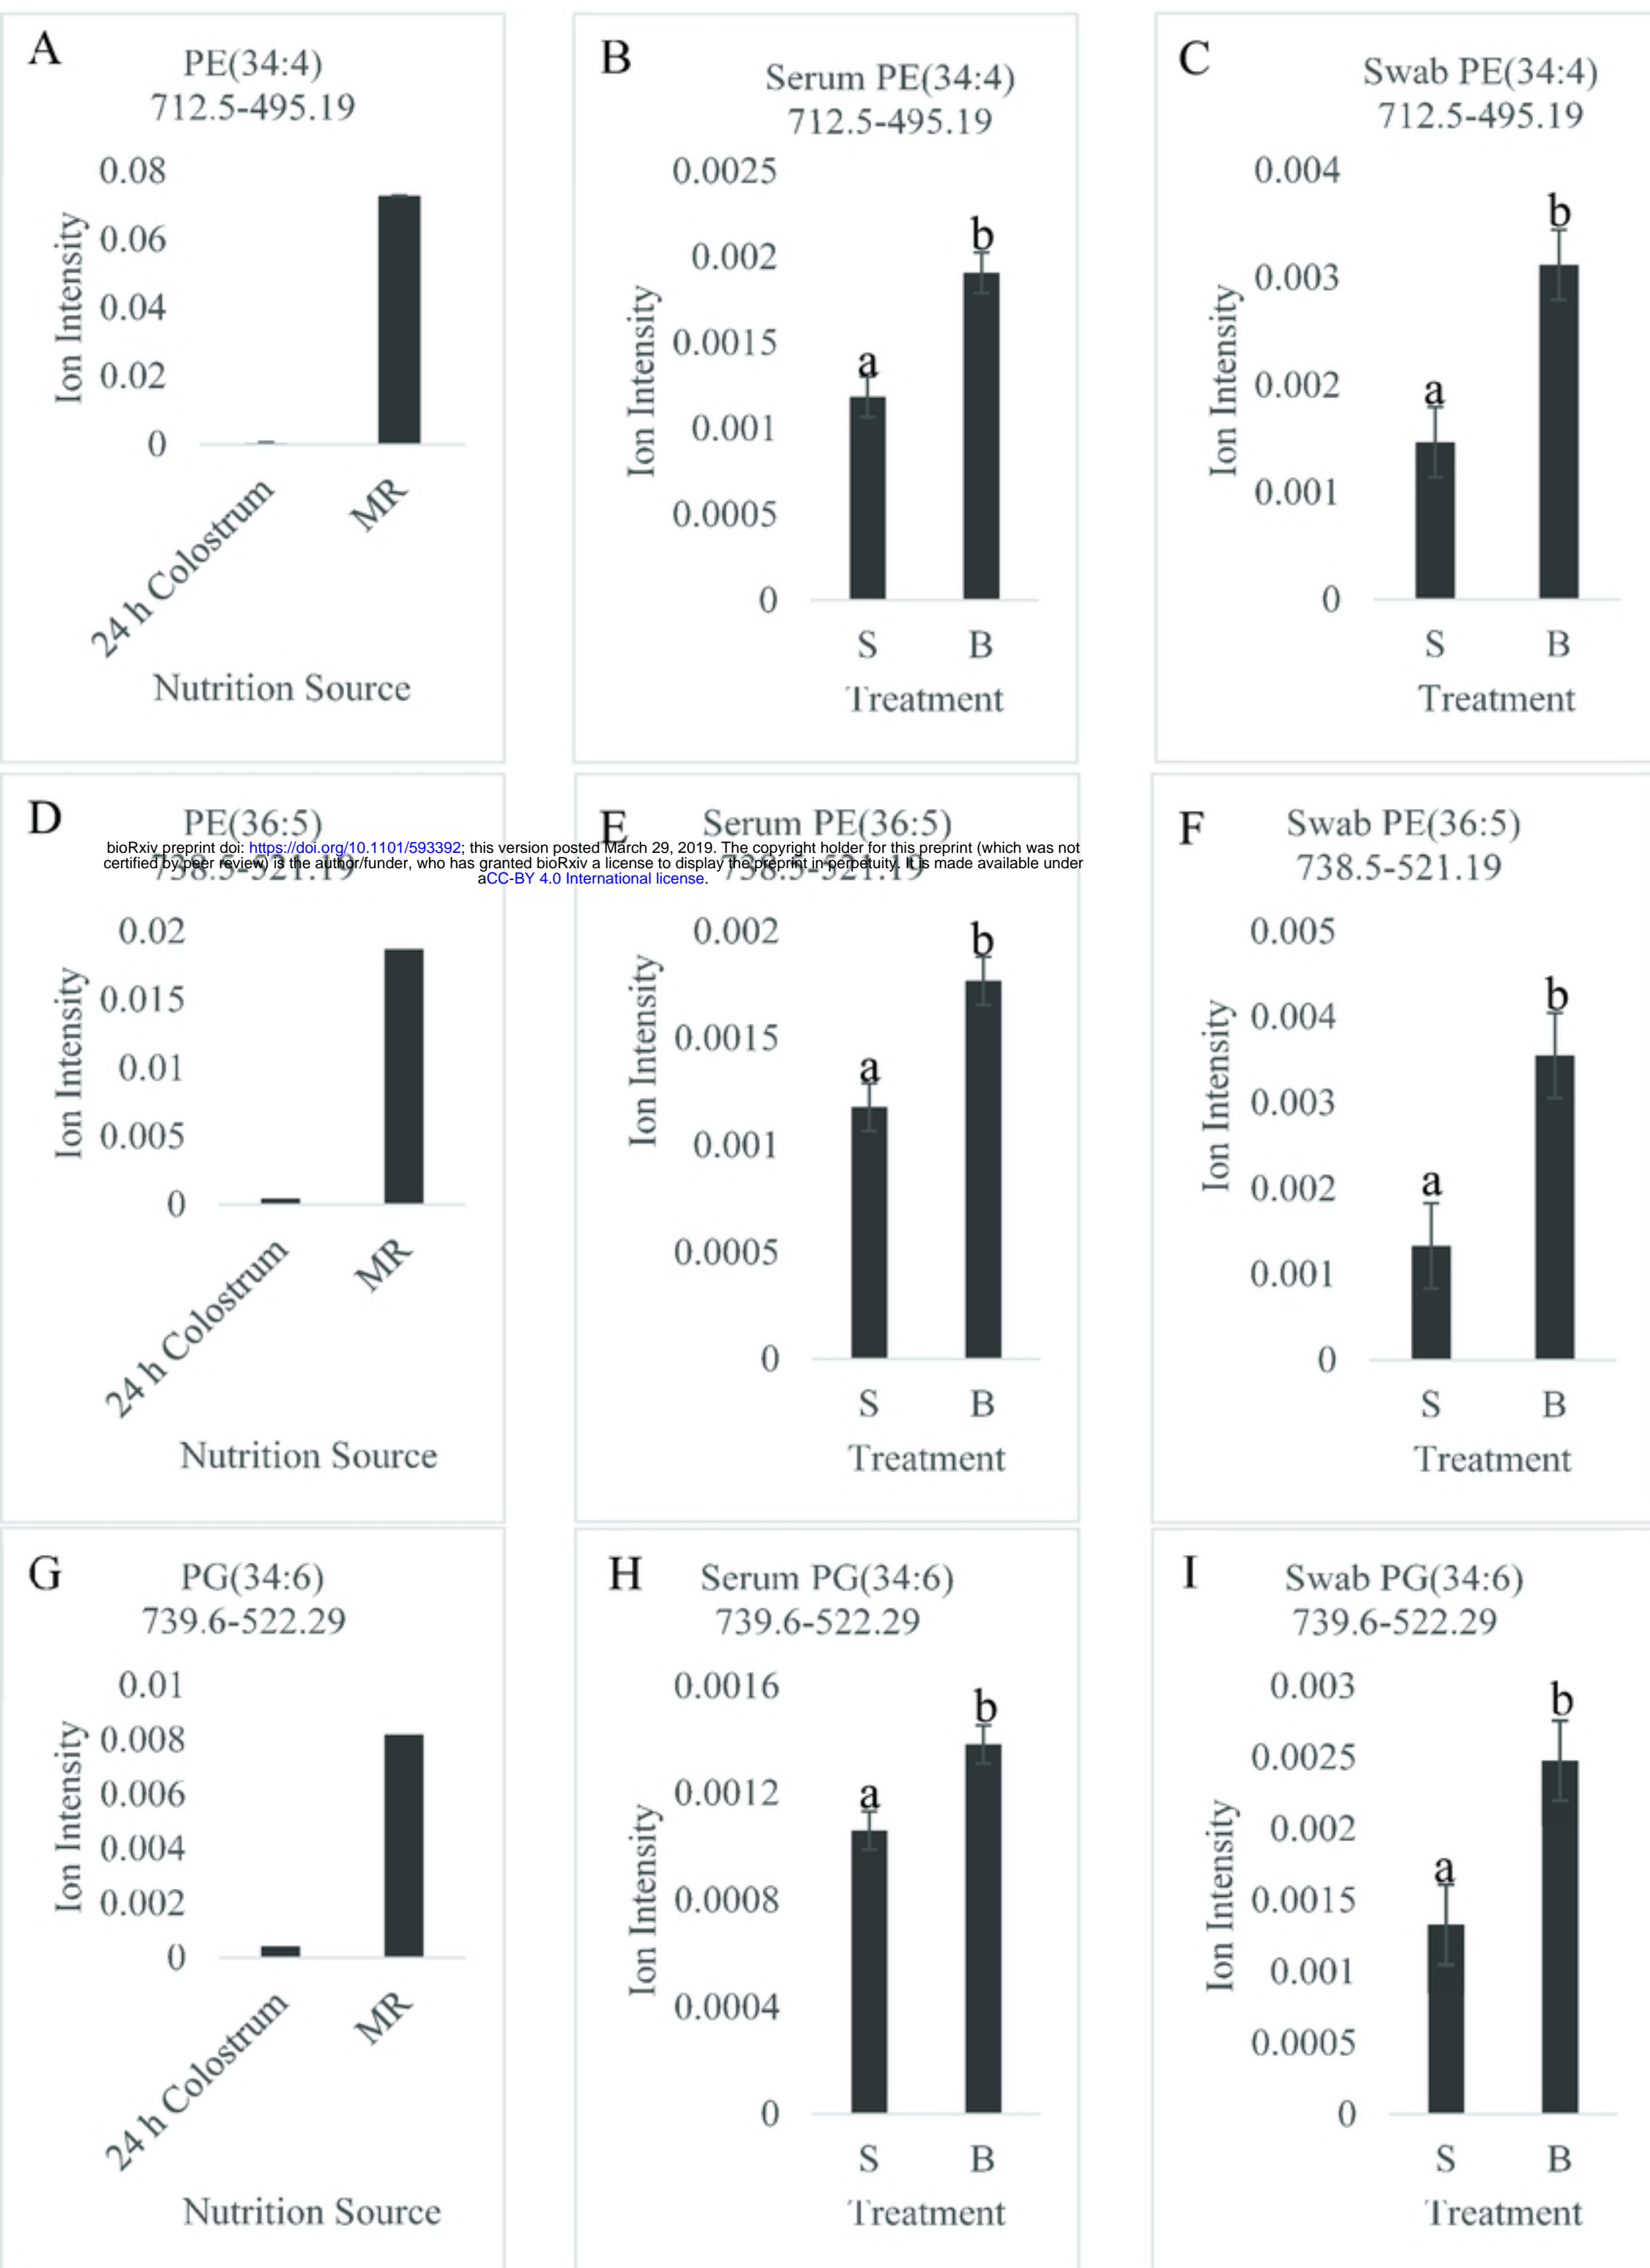

Figure 4

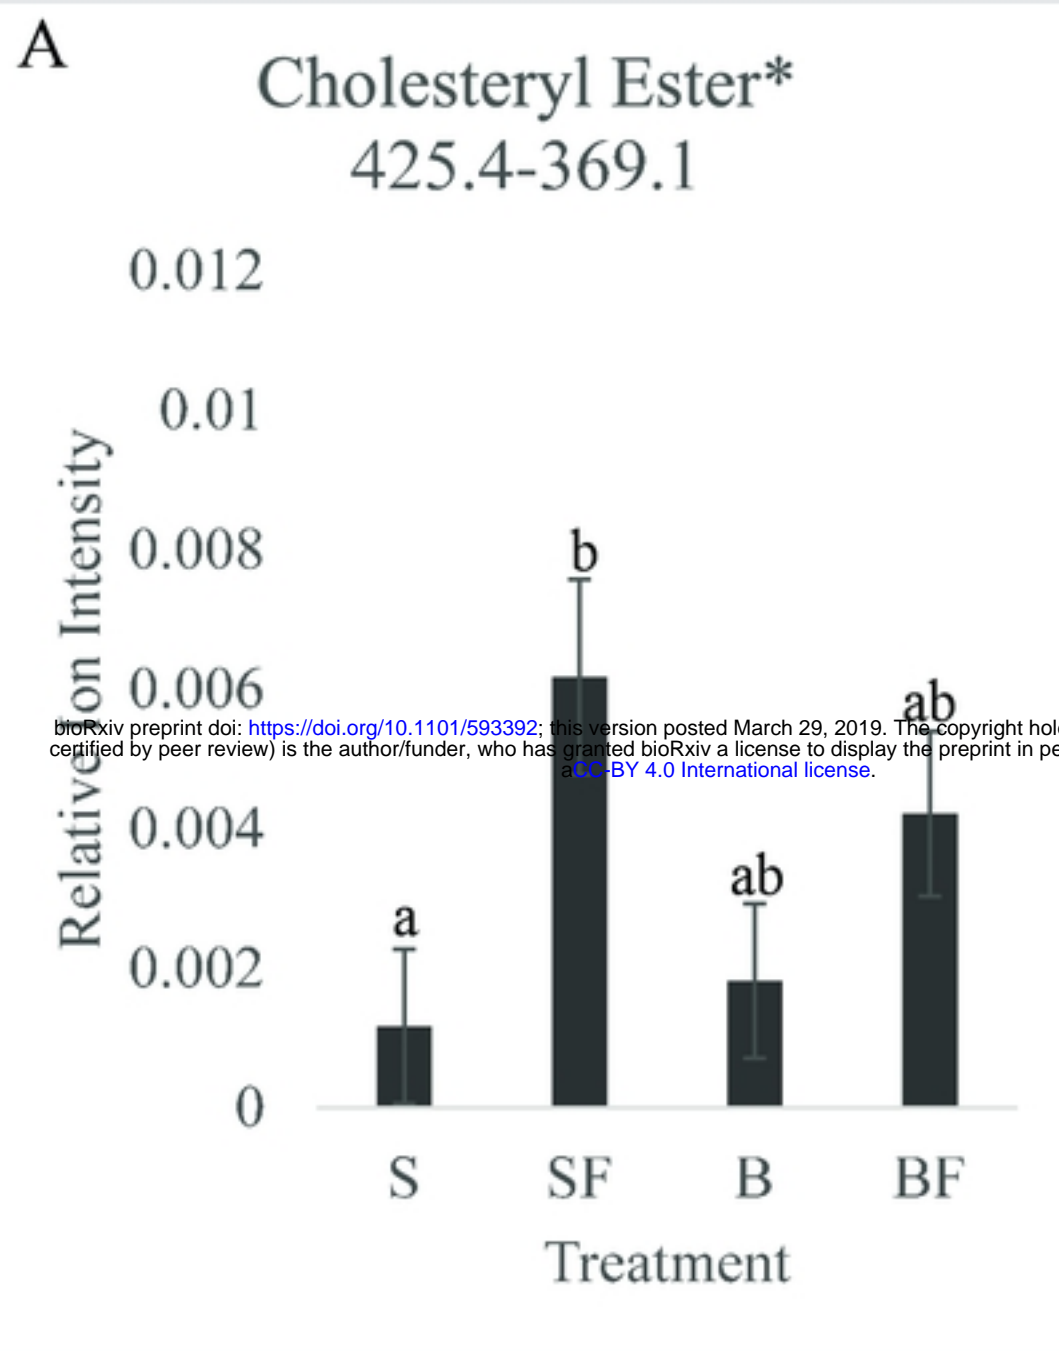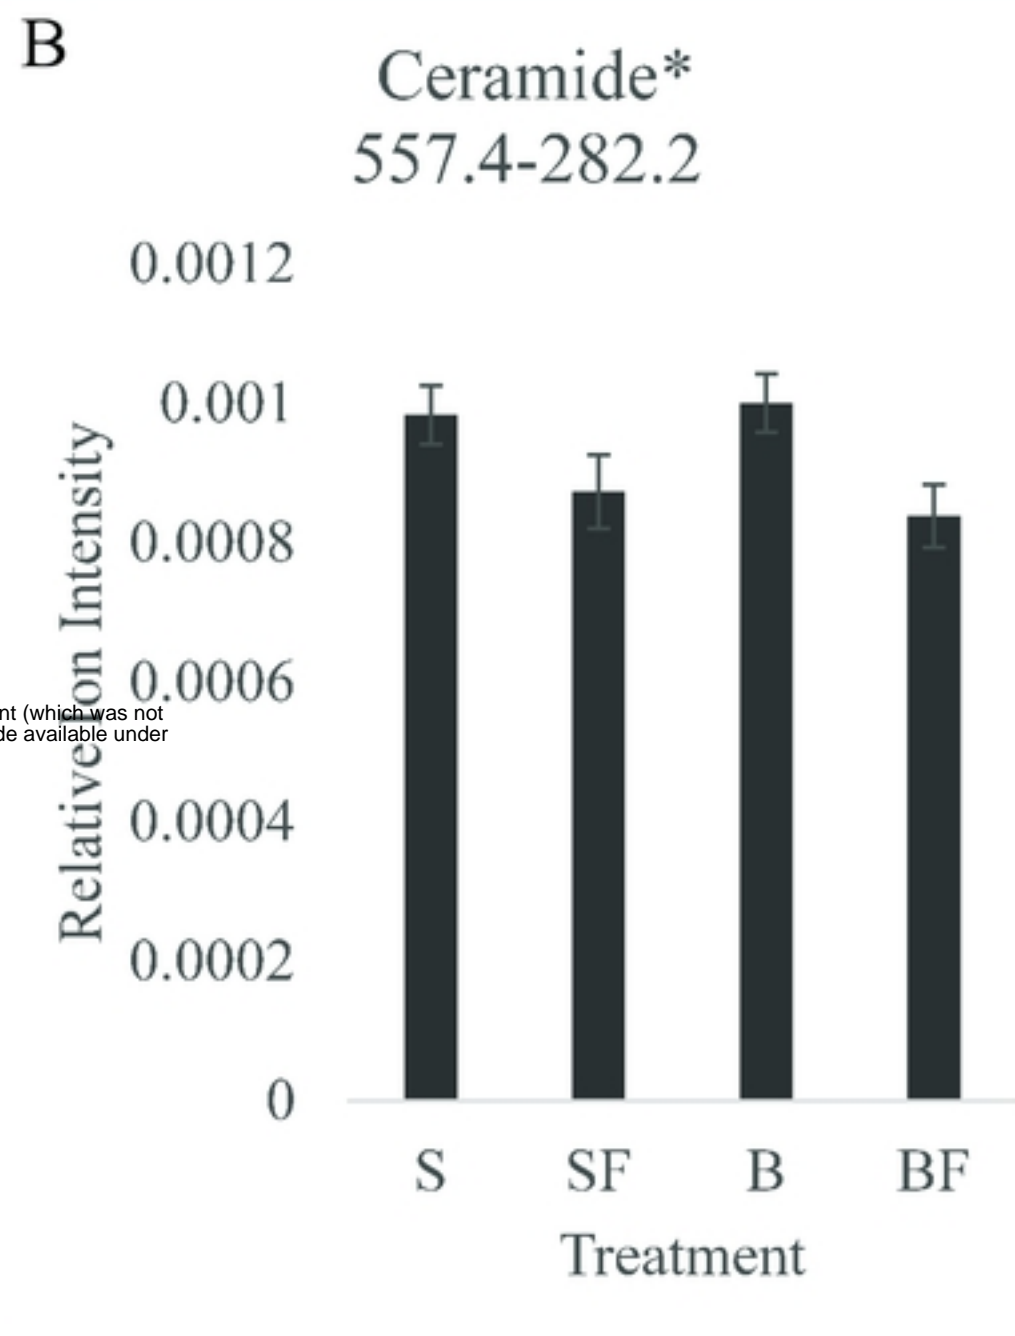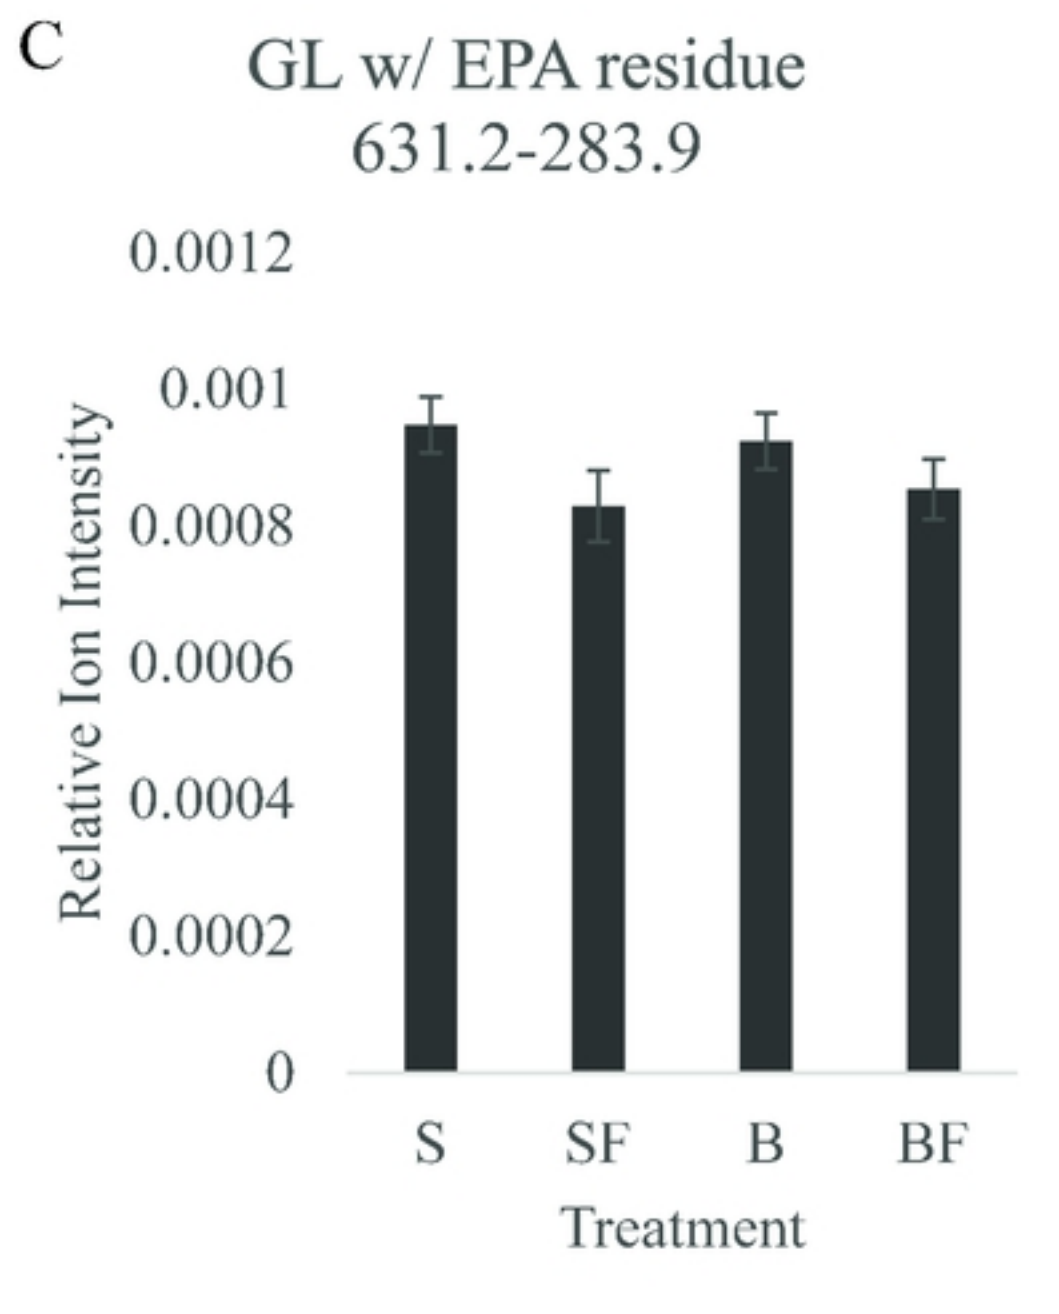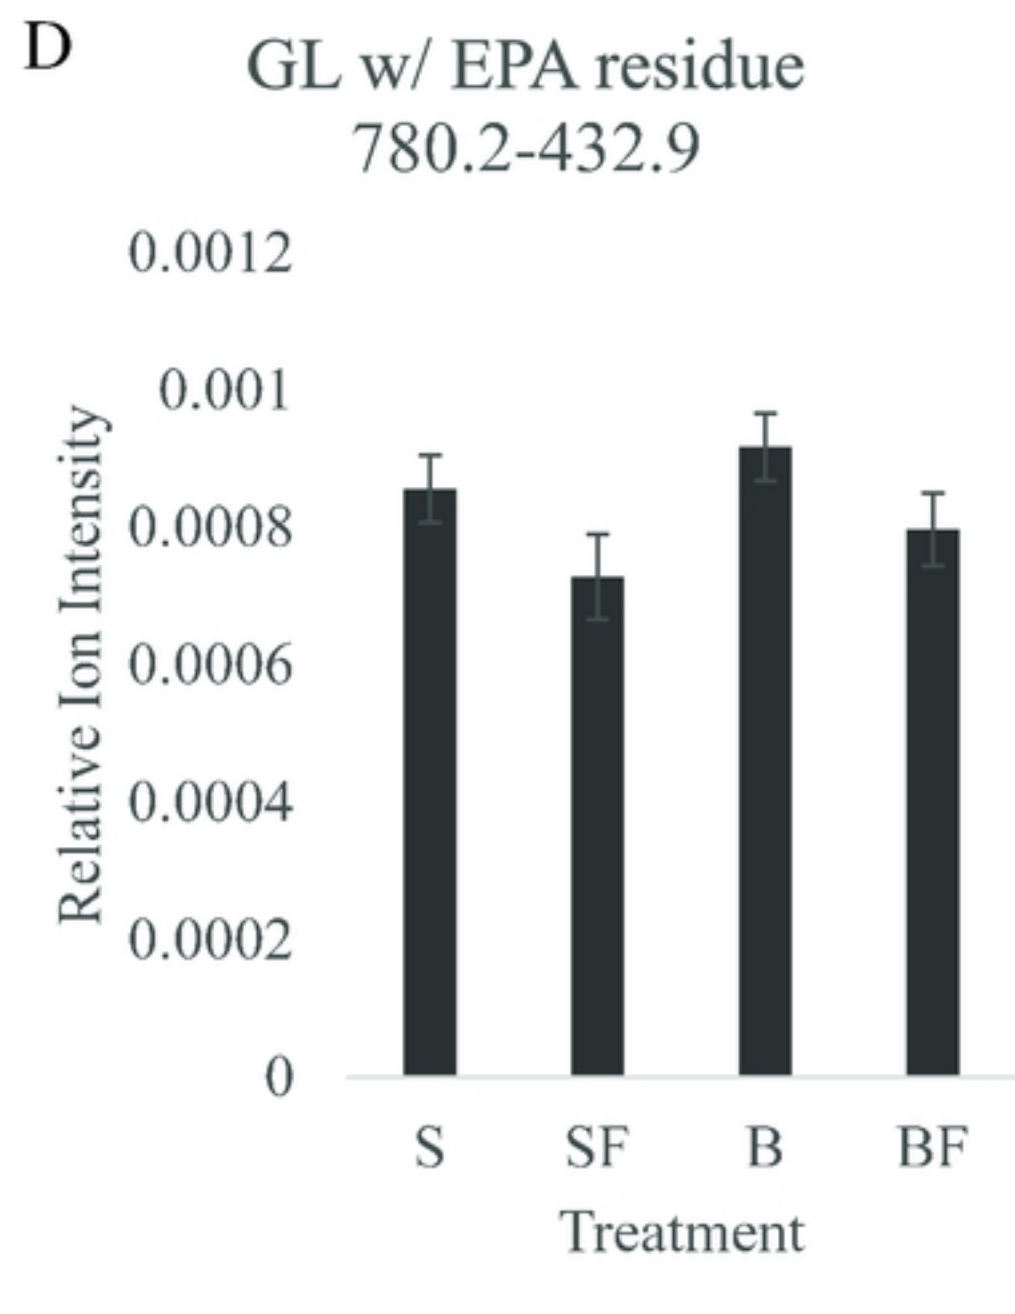

bioRxiv preprint doi: <https://doi.org/10.1101/593392>; this version posted March 29, 2019. The copyright holder for this preprint (which was not certified by peer review) is the author/funder, who has granted bioRxiv a license to display the preprint in perpetuity. It is made available under aCC-BY 4.0 International license.



bioRxiv preprint doi: <https://doi.org/10.1101/593392>; this version posted March 29, 2019. The copyright holder for this preprint (which was not certified by peer review) is the author/funder, who has granted bioRxiv a license to display the preprint in perpetuity. It is made available under aCC-BY 4.0 International license.

Figure 3.

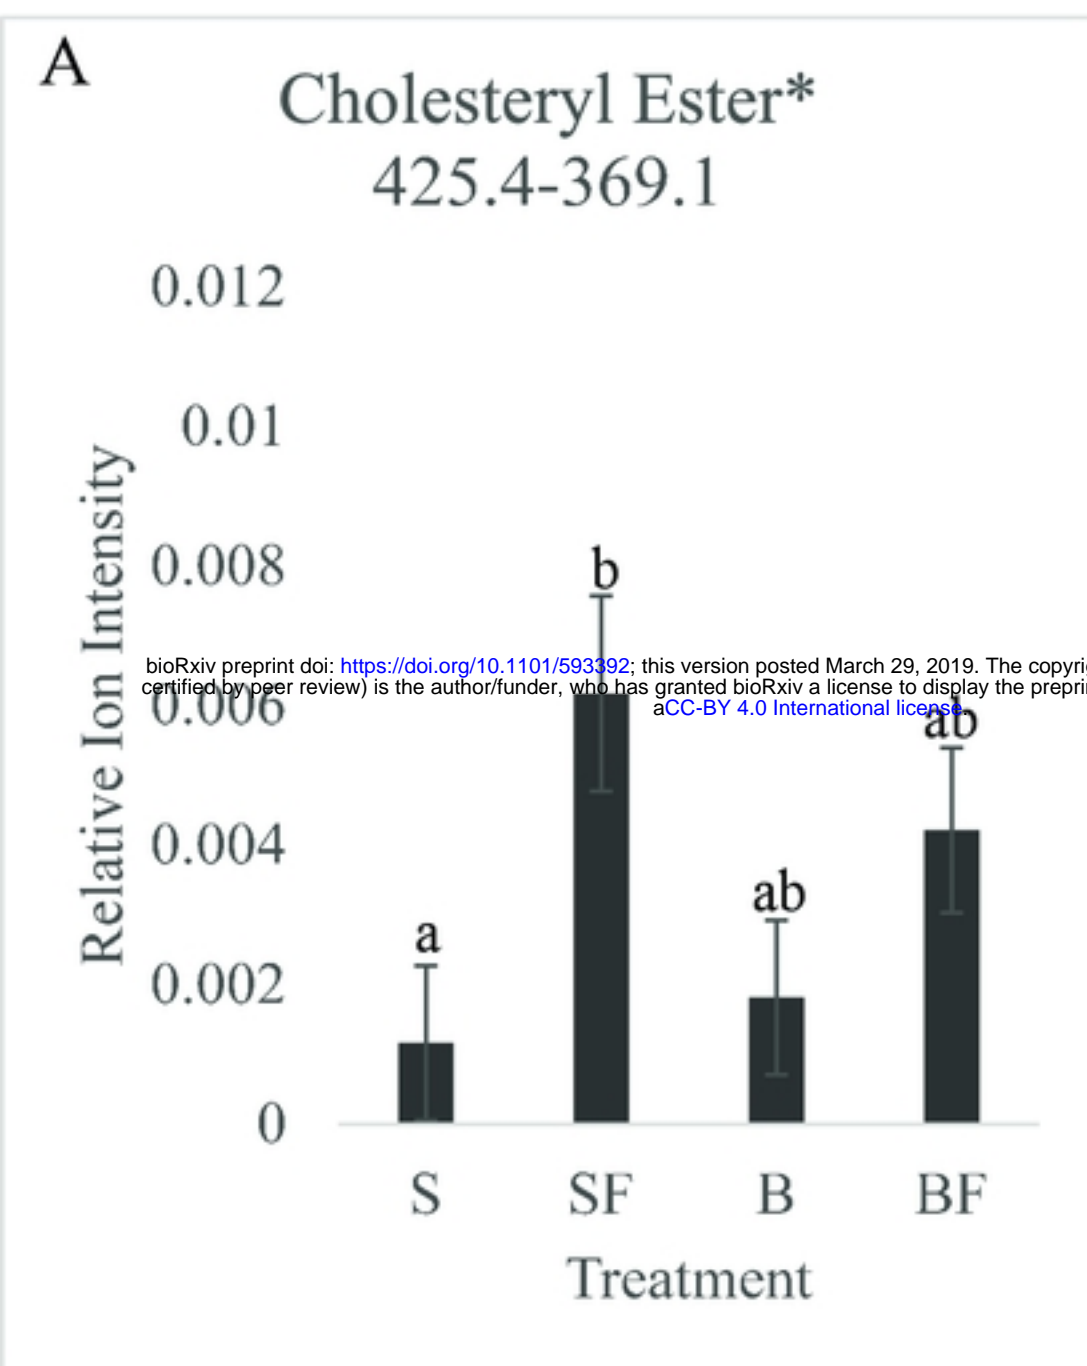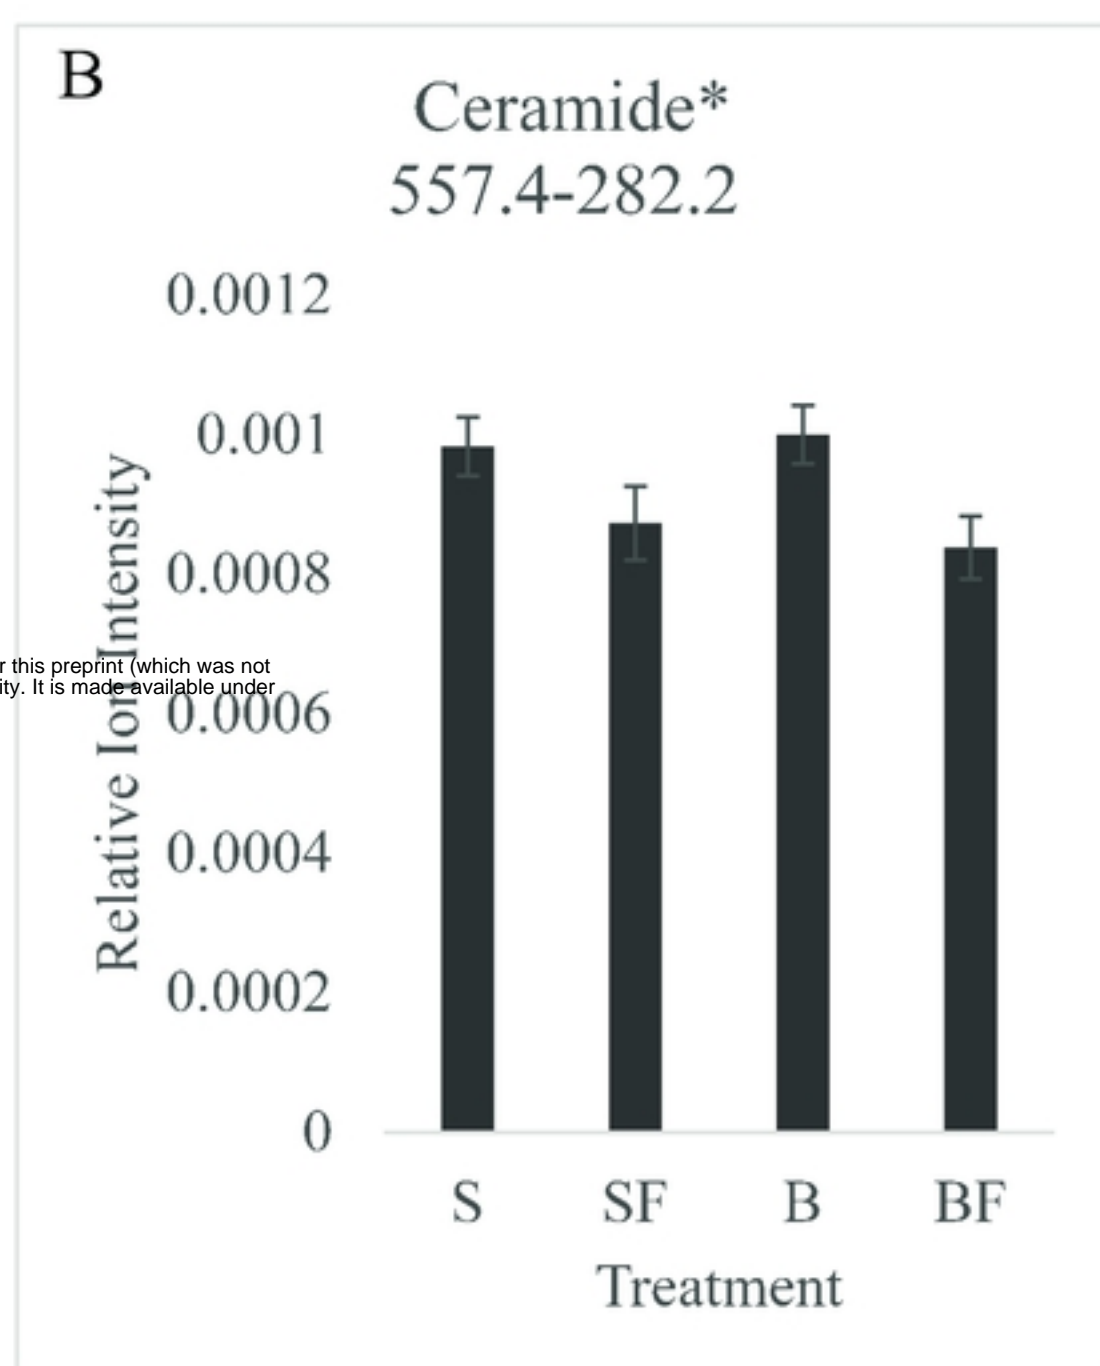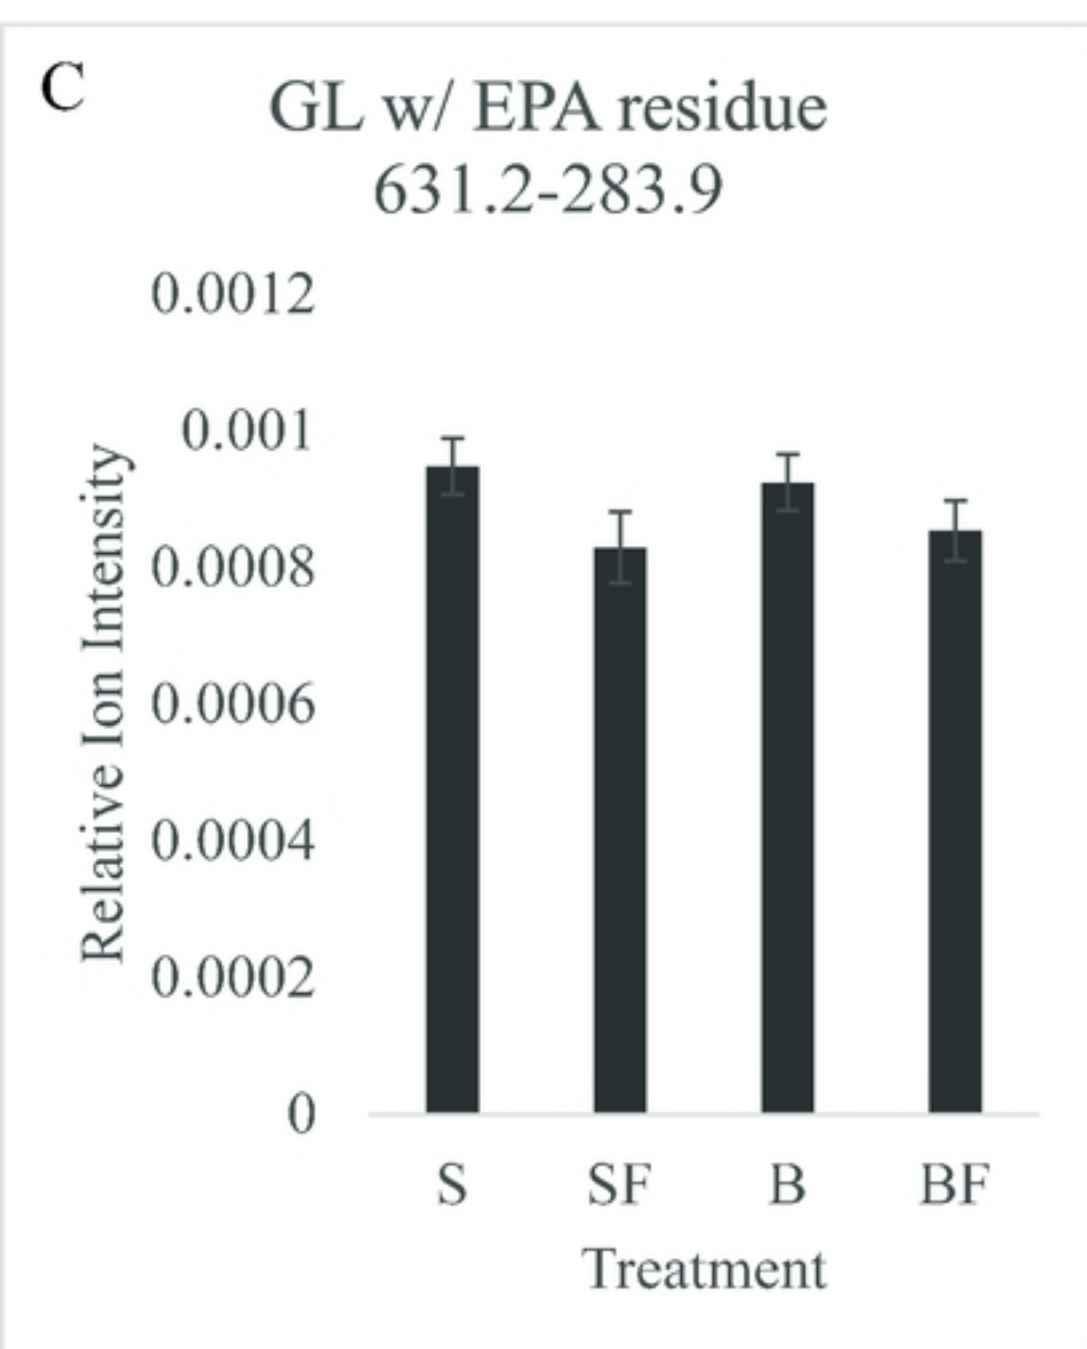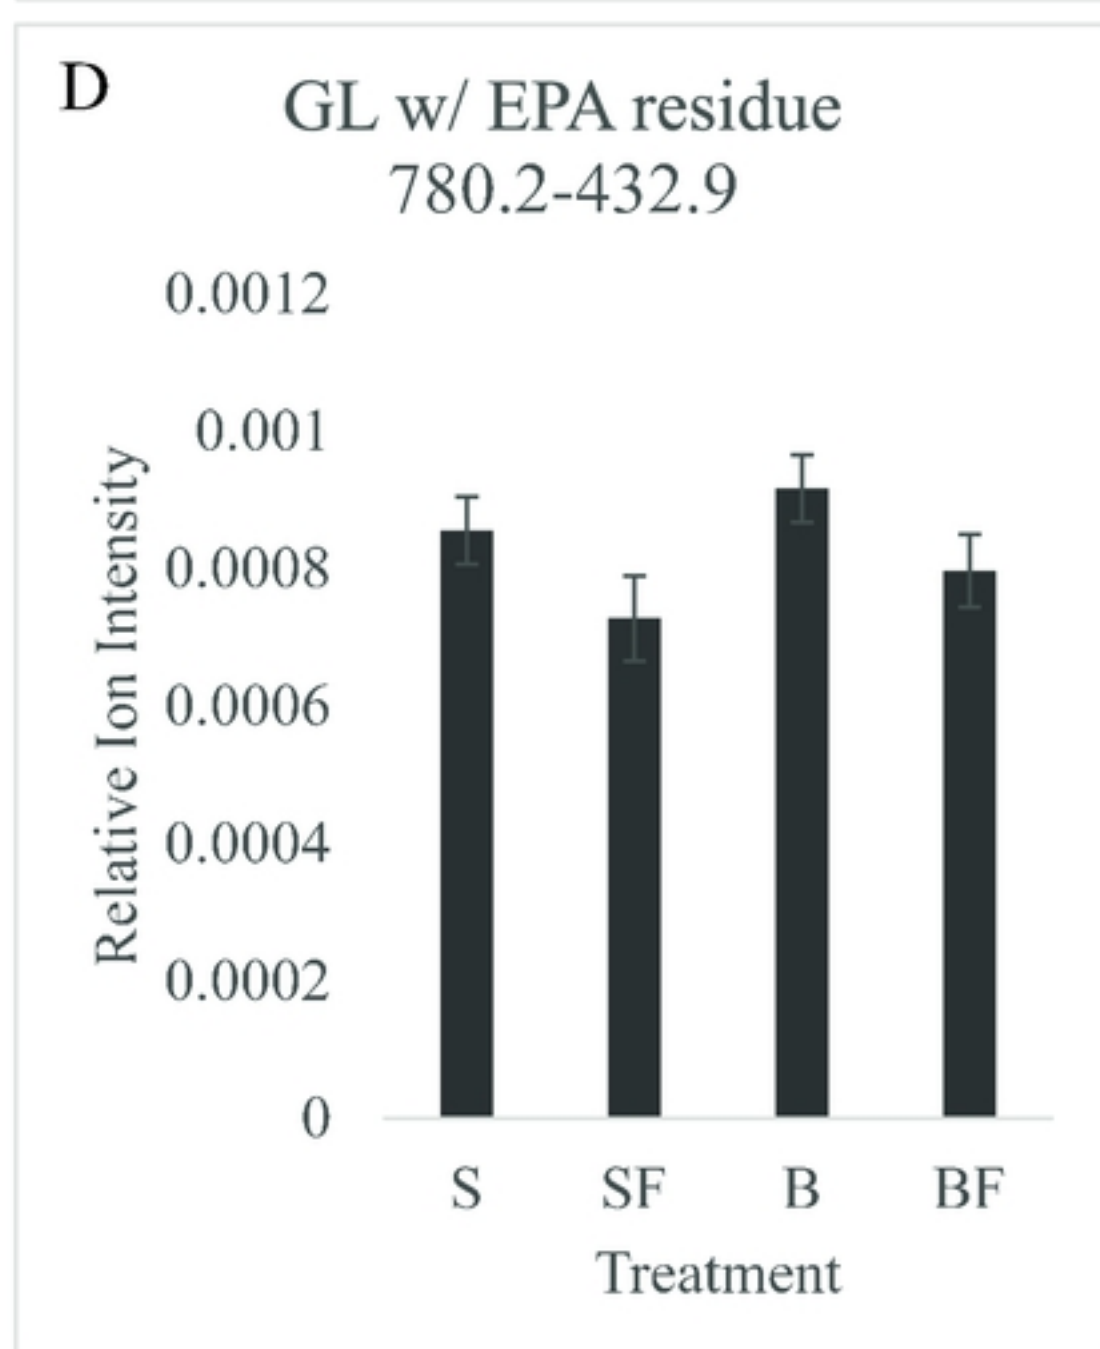

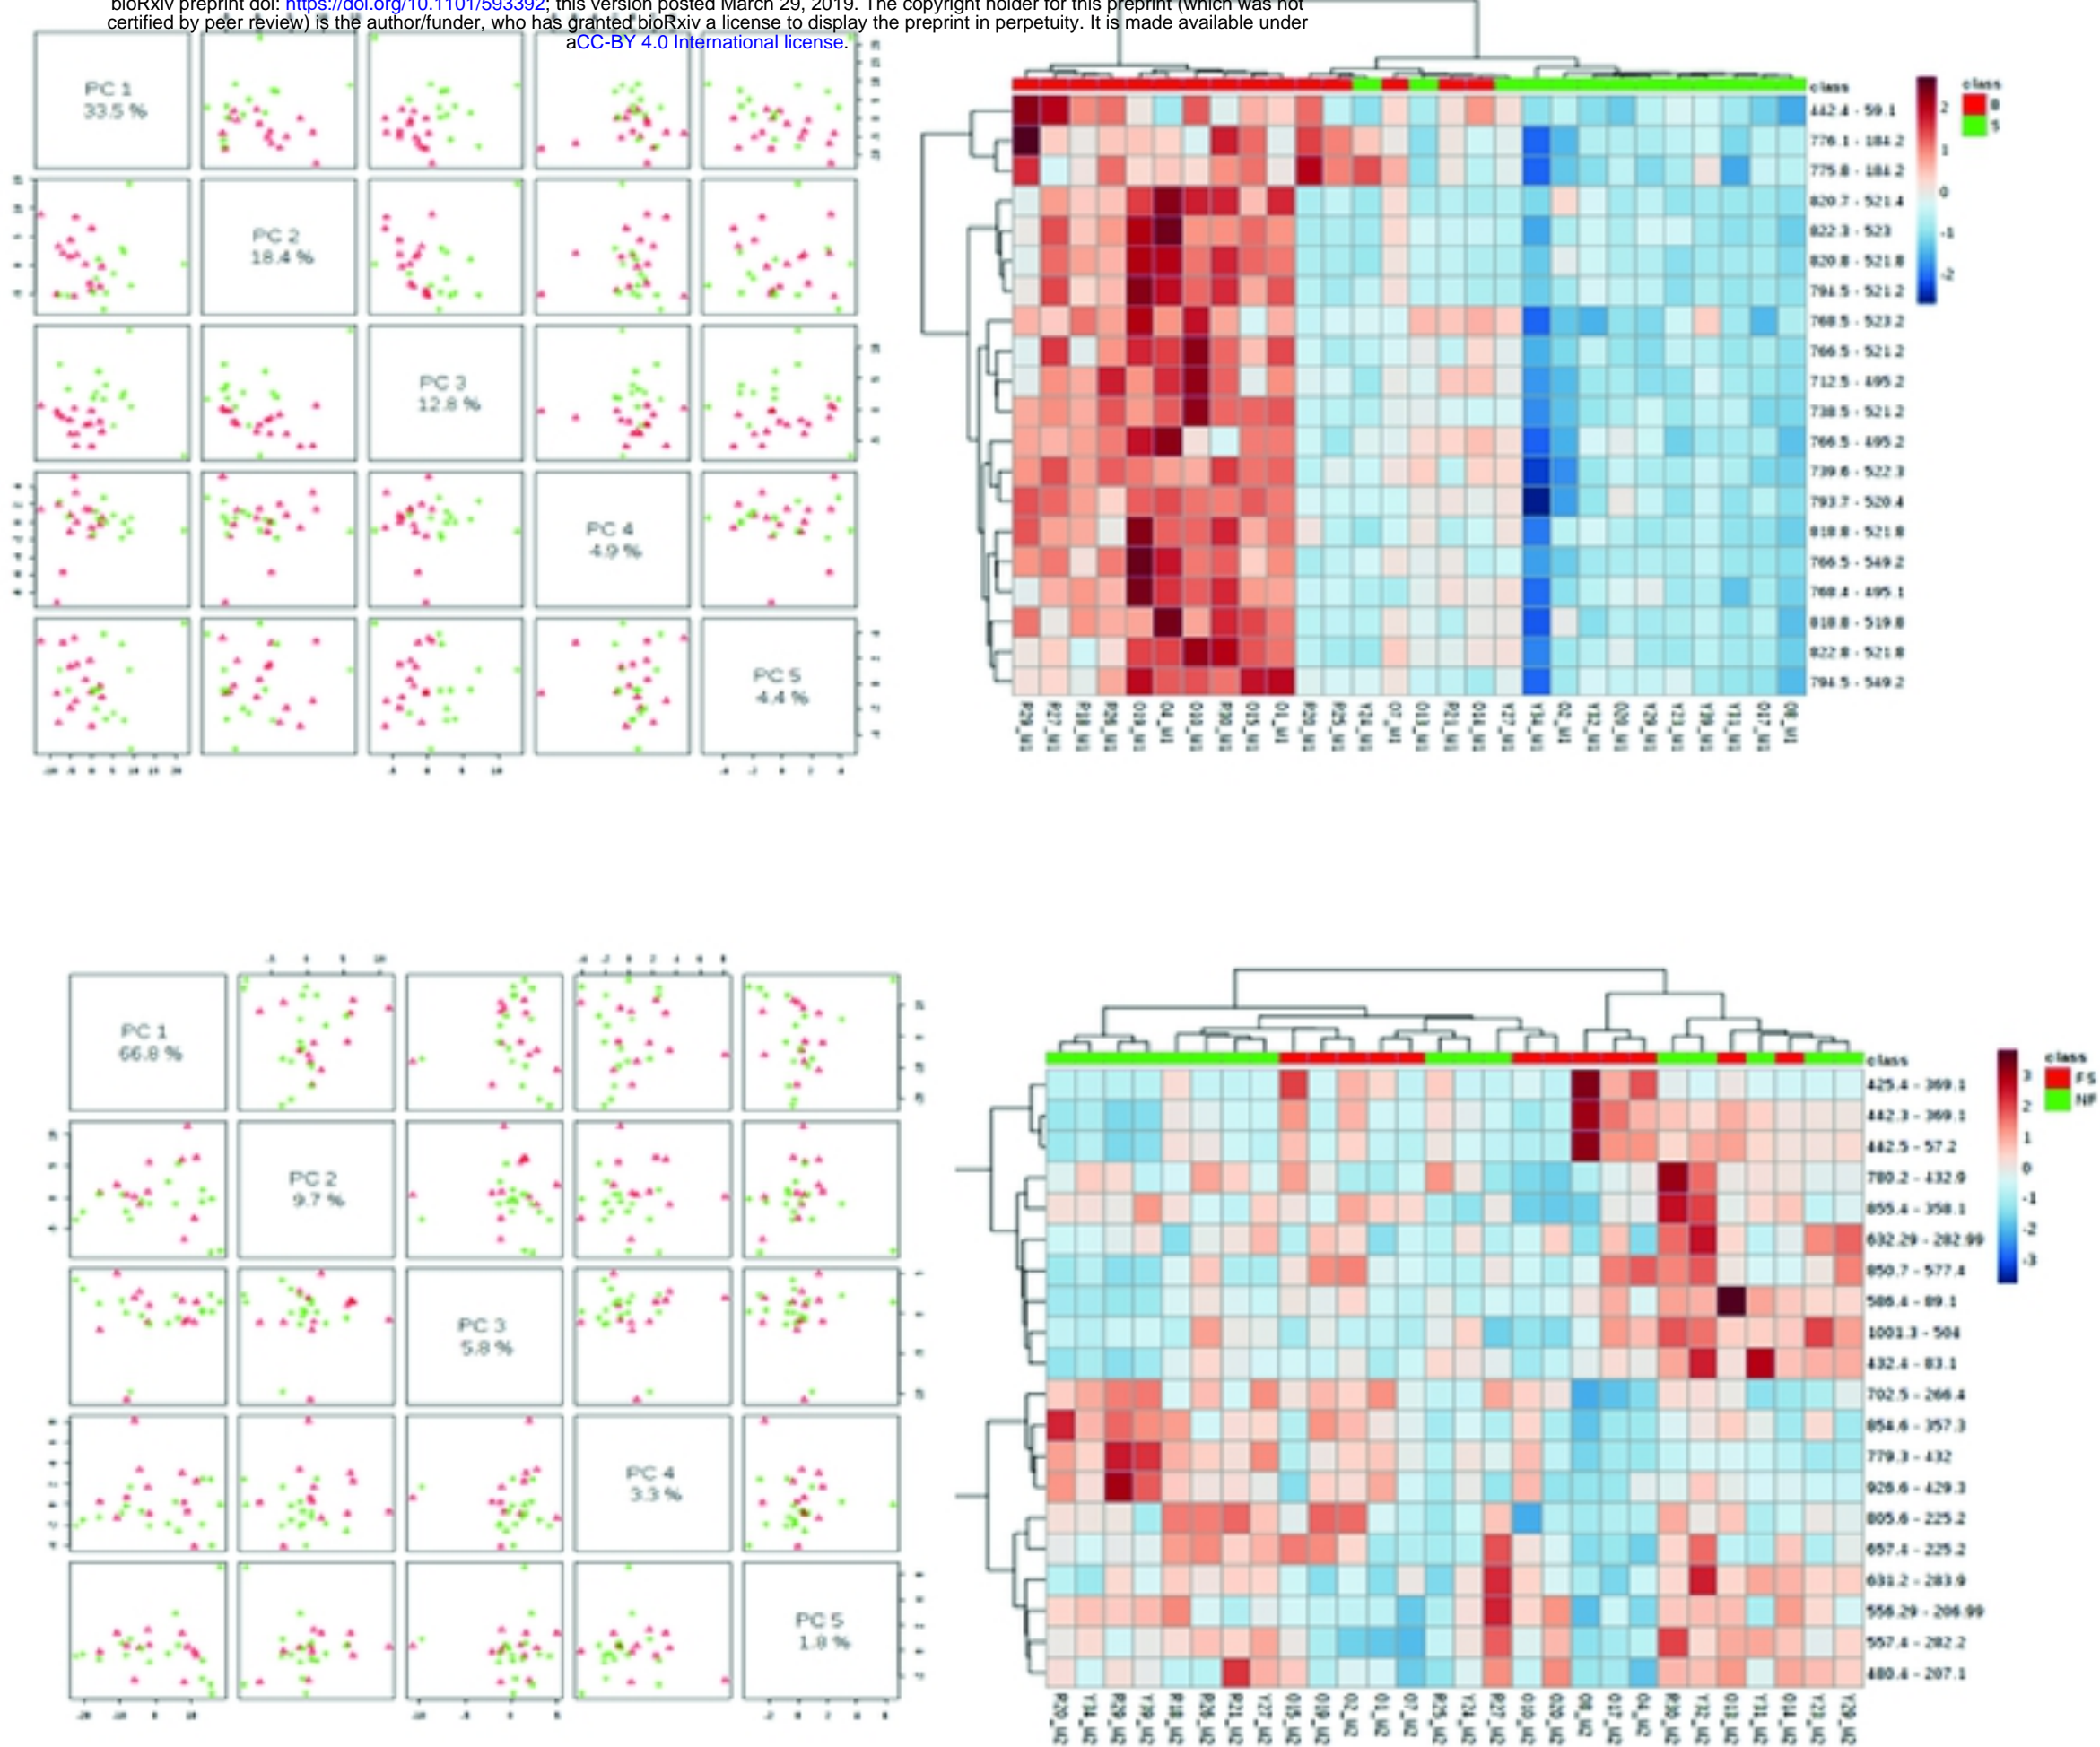

Figure 2

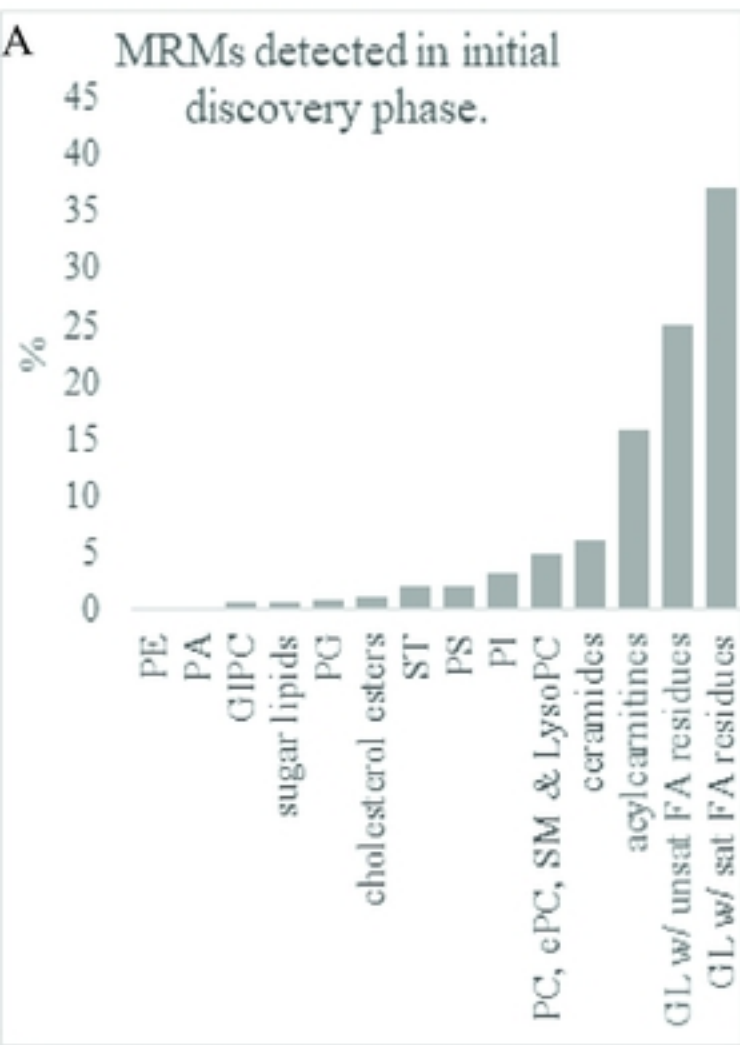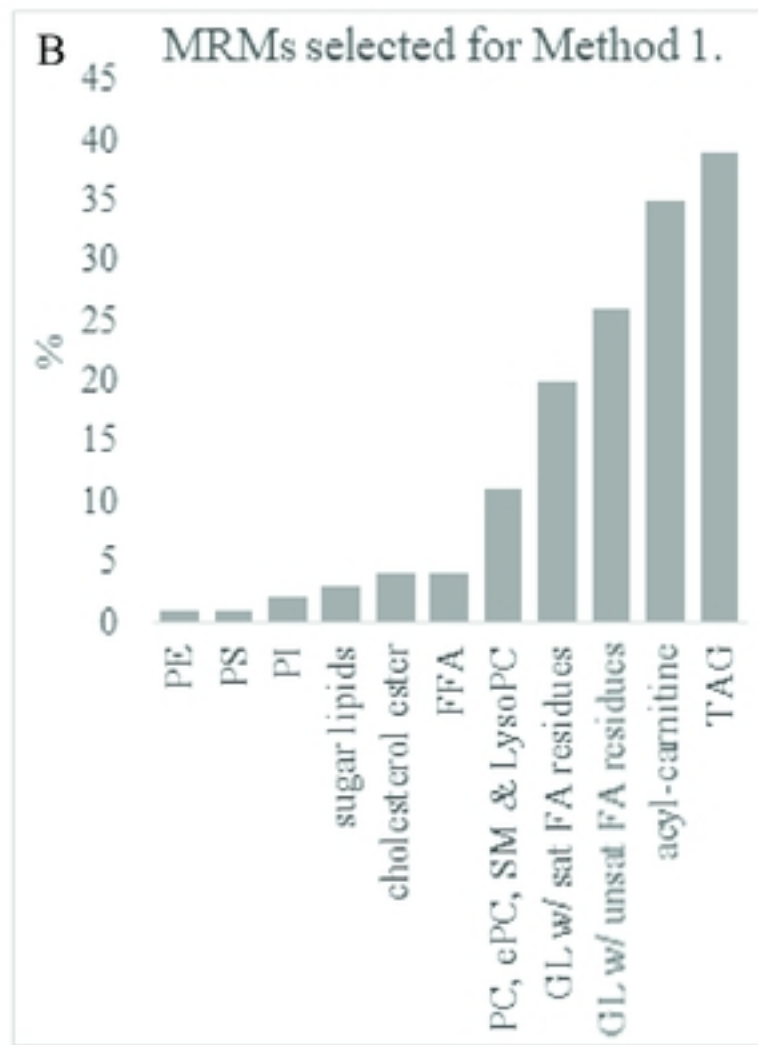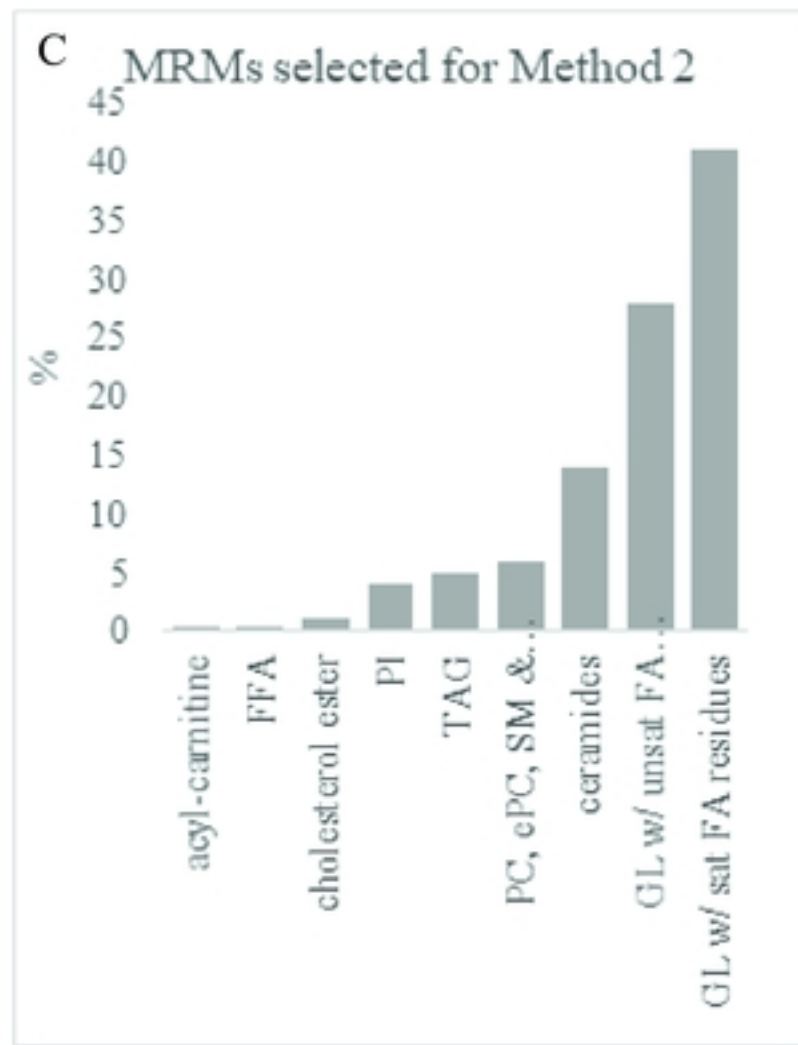

Figure 1
